1 **Single-cell DNA and RNA sequencing reveals the dynamics of intra-tumor heterogeneity in**  
2 **a colorectal cancer model**

3

4 **Short title:** ITH dynamics by single-cell sequencing

5

6 **AUTHORS**

7 Hanako Ono<sup>1</sup>, Yasuhito Arai<sup>2</sup>, Eisaku Furukawa<sup>1</sup>, Daichi Narushima<sup>1</sup>, Tetsuya Matsuura<sup>3</sup>, Hiromi

8 Nakamura<sup>2</sup>, Daisuke Shiokawa<sup>4</sup>, Momoko Nagai<sup>1</sup>, Toshio Imai<sup>3</sup>, Koshi Mimori<sup>5</sup>, Koji Okamoto<sup>6</sup>,

9 Yoshitaka Hippo<sup>3,7</sup>, Tatsuhiro Shibata<sup>2,8</sup>, and Mamoru Kato<sup>1,\*</sup>

10

11 **AFFILIATIONS**

12 <sup>1</sup> Department of Bioinformatics, National Cancer Center Research Institute, 5-1-1 Tsukiji, Chuo-ku,

13 Tokyo 104-0045, Japan

14 <sup>2</sup> Division of Cancer Genomics, National Cancer Center Research Institute, 5-1-1 Tsukiji, Chuo-ku, Tokyo

15 104-0045, Japan

16 <sup>3</sup> Department of Animal Experimentation, National Cancer Center Research Institute, 5-1-1 Tsukiji, Chuo-

17 ku, Tokyo 104-0045, Japan

18 <sup>4</sup> Division of Cancer Differentiation, National Cancer Center Research Institute, 5-1-1 Tsukiji, Chuo-ku,

19 Tokyo 104-0045, Japan

20 <sup>5</sup> Department of Surgery, Kyushu University Beppu Hospital, 101 Hasamamachiidaigaoka, Yufu, Oita

21 879-5593, Japan

22 <sup>6</sup> Division of Cancer Differentiation, National Cancer Center Research Institute, 5-1-1 Tsukiji, Chuo-ku,

23 Tokyo 104-0045, Japan

24 <sup>7</sup> Division of Biochemistry and Molecular Carcinogenesis, Chiba Cancer Center Research Institute, 666-2

25 Nitona-cho, Chiba Chuo-ku, Chiba 260-8717, Japan

26 <sup>8</sup> Laboratory of Molecular Medicine, Human Genome Center, The Institute of Medical Science, The

27 University of Tokyo, 4-6-1 Shiroganedai, Minato-ku, Tokyo 108-8639, Japan

28

29 \* Corresponding author

30 Tel: +81-3-3542-2511

31 E-mail: [mamkato@ncc.go.jp](mailto:mamkato@ncc.go.jp)

32

34 **Abstract**

35 Intra-tumor heterogeneity (ITH) encompasses cellular differences in tumors and is related to clinical  
36 outcomes, such as drug resistance. However, little is known about the dynamics of ITH, owing to the lack  
37 of time-series analysis at the single-cell level. We performed single-cell exome and transcriptome  
38 sequencing of 200 cells and investigated how ITH is generated from one single cell in a mouse colorectal  
39 cancer model. The ITH of the transcriptome increased after transplantation from cultured organoids, while  
40 that of the exome decreased. The RNA ITH increase was due to the emergence of new transcriptional  
41 subpopulations. In contrast to the initial cells expressing mesenchymal-marker genes, new subpopulations  
42 repressed these genes at transplantation, suggesting that the birth of transcriptional subpopulations without  
43 substantial genetic changes is associated with mesenchymal-epithelial transformation at metastasis.  
44 Analyses of colorectal cancer data from The Cancer Genome Atlas, revealed a higher proportion of  
45 patients with metastatic tumor among human subjects with expression patterns similar to those of mouse  
46 cell subpopulation. This study revealed an evolutionary pattern of single-cell RNA and DNA changes in  
47 tumor progression, giving clinical insights into the mesenchymal-epithelial transformation of tumor cells  
48 and subclasses of colorectal cancer.

49

50 **Author summary**

51 “Intra-tumor heterogeneity (ITH)” is one of the root causes of cancer malignancy, including drug  
52 resistance; however, little is known about the time-dependence of ITH. To investigate how ITH is  
53 generated, we combined single cell DNA and RNA sequencing technologies with a mouse colorectal  
54 cancer model, ideal for time-series analysis. Our results suggested that mouse cancer cells, with sufficient  
55 mutations, adapted to the drastic environmental changes of allograft into a mouse. Transcriptional and  
56 genetic ITH increased and somewhat decreased, respectively. New transcriptional subpopulations  
57 emerged, showing mesenchymal-epithelial transformation. Using human colorectal cancer data, we found  
58 a remarkable trend of metastasis in a fraction of human patients whose expression patterns were similar to  
59 those of the mouse-cell subpopulations.

## 60 **Introduction**

61 It is well established that cancer is pathologically composed of different types of cells [1]; however, intra-  
62 tumor heterogeneity (ITH) has only been recently addressed at the genomic level [2]. ITH is clinically  
63 important. For example, elevated copy-number heterogeneity is related to an increased risk of recurrence  
64 or death in non-small-cell lung cancer [3]. High levels of ITH ultimately provide the seeds for the  
65 emergence of anti-cancer drug resistance [4]. High levels of genetically-characterized heterogeneity in  
66 Barrett's esophagus are associated with incidence of esophageal adenocarcinoma [5].

67 ITH essentially stands for the cellular differences in tumor tissue arising from genetic changes,  
68 called clonal evolution, or non-genetic changes, such as cancer stem cells and simple transcriptional  
69 responses to the environment. In clonal evolution, as in Darwinian evolution, cancer cells with  
70 advantageous genetic mutations evolve into different types of cancer cells [6]. In contrast, cancer stem  
71 cells, like normal stem cells, produce a variety of differentiated daughter cells that constitute  
72 phenotypically distinct cancer cells without genetic differences through epi-genetic and the resultant  
73 transcriptional mechanisms [7, 8].

74 A flood of studies have addressed ITH through the variant allele frequencies (VAFs) of tumor  
75 cells in bulk, which are calculated from sequence reads with variants identified through next-generation  
76 sequencing (reviewed in [2, 9]). In this bulk-cell sequencing approach, the presence of minor clones is  
77 often reflected on lower VAFs than the VAF of the major clone [10]. However, this bulk-cell DNA  
78 sequencing approach is limited in revealing genetic ITH because it only infers the presence of clones, not  
79 directly observing individual cells. In addition, the bulk-cell approach is generally not suitable to resolve  
80 transcriptomic ITH, where transcript mixtures from different cells are sequenced.

81 Single-cell sequencing is a powerful technology for investigating ITH by identifying genomic  
82 alterations and distinct transcriptomic states in single tumor cells [11-19]. For example, in clinical samples  
83 of glioblastoma, single-cell RNA sequencing showed that individual tumor cells vary in terms of their  
84 degree of stemness-related gene expression from extremely stem-like to differentiated states [13].  
85 Additionally, the existence of cancer stem cells that continuously differentiate into astrocyte- and  
86 oligodendrocyte-like cells has been demonstrated in oligodendrogliomas by single-cell RNA sequencing

87 [14]. Single-cell DNA sequencing has also been applied to breast cancer samples to evaluate ITH  
88 originating in genomic DNA, leading to the suggestion of stepwise/sweepstake or gradual evolution of  
89 cancer cells from single nucleotide variation (SNV) data, respectively [11, 12, 20]. However, these types  
90 of ITH and their respective evolutionary mechanisms are based on snapshot data at one-time point.  
91 Furthermore, either RNA or DNA was solely examined. It is necessary to address both RNA and DNA  
92 over time for the full elucidation of tumor evolutionary dynamics associated with ITH.

93         Mouse models are more useful than human clinical samples for examining changes in genomic  
94 and transcriptomic states over time. In a breast tumor xenograft mouse model, single-cell DNA  
95 sequencing of serially passaged samples identified tumor cell subpopulations and suggested that tumor  
96 cells in the same initial state followed the same evolutionary trajectory [21]. In the present study, we  
97 employed a modified version of the mouse colorectal cancer model that we previously established [22]  
98 and sequenced both single-cell DNA and RNA. We thus investigated how ITH based on the exome and  
99 transcriptome changes over time at the single-cell level.

100  
101  
102  
103  
104  
105  
106  
107  
108  
109  
110  
111  
112  
113

## 114 **Results**

### 115 **Colorectal cancer mouse model**

116 The colorectal cancer mouse model was established by knocking down *APC* expression in normal  
117 epithelial cells taken from mouse intestinal crypts using short hairpin RNA (shAPC; **Fig. 1A**) [22]. In the  
118 previous system, we used bulk cells from a tissue for culture; however, in this study, we cultured  
119 organoids from *one single cell* so that heterogeneity observed in these cultures could not be confused with  
120 heterogeneity originating from the knock-down efficiency or intestinal crypts [23].

121 We grew organoids for a period of five months so that a single cell having only artificial *APC*  
122 intervention could naturally obtain mutations to transform into tumor cells. Cultured cells were  
123 subcutaneously transplanted into a nude mouse. One month after transplantation, the mouse was  
124 sacrificed, and the tumor was harvested; half of the tumor tissue was re-cultured in our three-dimensional  
125 (3D) culture system for one month. Using half-samples preserved the same genetic lineage over time. The  
126 process was repeated once more. We sequenced single-cell RNA and DNA separately taken from the  
127 different single cells of multiple organoids, which descended from one single cell.

128 Hematoxylin-eosin (HE) staining revealed that subcutaneously transplanted organoids formed  
129 tumors consisting of both glandular and non-glandular structures (HE *a* and *b* in **Fig. 1A**). Glandular  
130 components in HE *a* were mainly lined with single-layered epithelia, while those in HE *b* were  
131 characterized by increased multi-layered regions, loss of cellular polarity, and nuclear enlargement. Non-  
132 glandular components had a stromal/medullary structure consisting of spindle-shaped or round to  
133 polygonal cells, were characteristically gelatinous/fibrous, and had an abundance of fibrous stroma.

134 The *APC* expression was decreased in the *APC* knockdown samples according to bulk-cell RNA  
135 sequencing (**Fig. 1B**). Out of the 31 significantly mutated genes (excluding *TTN*) defined by The Cancer  
136 Genome Atlas (TCGA) colorectal cancer study [24], we found two mutations in *KRAS* and *TP53* by bulk-  
137 cell DNA sequencing in our model (**Fig. 1C**), though the *KRAS* mutation was located outside of, but close  
138 (9 bps) to, an exon and the position was evolutionary conserved as much as exons (S1 Appendix: **Figure**  
139 **S1**). The *KRAS* mutation occupied only a small fraction (2.5%) of the population at T0.5 but increased to  
140 46.4% at T3. Additionally, we found nonsynonymous mutations in six, *CLTC*, *LRP1B*, *ALK*, *GRIN2A*,

141 *MSH2*, and *SALL4* out of the cancer-related genes in COSMIC Gene Census [25] (**Fig. 1C**). It seems that  
142 the substitution of clones occurred between T0.5 and T1.

143

#### 144 **Single-cell transcriptome analysis**

145 We checked various indices of single-cell transcriptome data to filter 42, 42, and 51 cells out of the 50 T1,  
146 43 T2, and 52 T3 cells, respectively (S1 Appendix: **Figure S2**). The median ( $\pm$  inter-quartile range)  
147 number of mapped reads, mapping rate, and number of expressed genes across selected cells were  $6.2 \times$   
148  $10^6$  ( $\pm 2.0 \times 10^6$ ), 61.9% ( $\pm 5.39\%$ ), and 3814 ( $\pm 889.5$ ), respectively. There was a strong correlation  
149 between gene expression levels in the bulk sequencing data and average expression levels across single  
150 cells (S1 Appendix: **Figure S2**;  $R^2 = 0.9$ ).

151 A principal component analysis (PCA) plot of cells based on expression levels revealed increased  
152 heterogeneity from T1 to T2 (**Fig. 2A**). This was quantitatively confirmed by the diversity index (distance  
153 from the centroid in the PCA space) (**Fig. 2B**). In the plot, T2 and T3 cells partly overlapped but were  
154 separate from T1 cells. We identified genes whose expression levels varied greatly across cells at each  
155 time point; that is, these genes had high corrected coefficient of variation (*cCV*) values (S1 Appendix:  
156 **Figure S3**), and were thus referred to as highly variable genes. There were eight, 14, and 16 highly  
157 variable genes at T1, T2, and T3, respectively, reflecting an increase in variability from T1 to T2.

158 A cluster analysis of highly variable genes identified three gene groups (S1 Appendix: **Figure**  
159 **S4**); expression levels were correlated within two of the groups, but not within the third group. Gene set  
160 enrichment analysis showed that one of the correlated groups was associated with negative regulation of  
161 keratinocyte differentiation (referred to as Anti-Epithelial genes) ( $P = 3.80 \times 10^{-3}$ ), whereas the other was  
162 associated with positive regulation of cGMP and guanylate cyclase (GC) activity (referred to as  
163 cGMP/GC genes) ( $P = 1.30 \times 10^{-3}$ ), which are known to be associated with negative regulation of  $\beta$ -  
164 catenin signaling and matrix metalloproteinase activity in colorectal cancer [26, 27].

165 A heatmap generated from the cluster analysis revealed that T1 cells were relatively homogenous  
166 and formed one group that highly expressed Anti-Epithelial genes but showed negligible expression of  
167 cGMP/GC genes (**Fig. 2C**). This group was therefore termed Anti-Epithelial. In addition to an Anti-

168 Epithelial cell group, two new groups appeared at T2: one showing the opposite pattern, repression of  
169 Anti-Epithelial and activation of cGMP/GC gene expression, referred to as the cGMP/GC cell group; the  
170 other showed repression of both Anti-Epithelial and cGMP/GC genes. Notably, as shown in the heat map,  
171 bulk-cell sequencing analysis alone could not have identified these cell groups, where their distinct  
172 expression patterns were offset by bulk-cell expression levels (labeled as T1, T2, and T3 bulk in **Fig. 2C**).

173 T3 cells showed similar grouping to T2 cells. In a PCA plot based on highly variable gene  
174 expression (**Fig. 2D**), cells of the Anti-Epithelial group seemed close together across all time points, but  
175 seemed to form two groups—i.e., T1 main (referred to as T1 main) and T1/T2/T3 mixture (T1+T2+T3).  
176 The cGMP/GC and other groups seemed close together and contained T2 and T3 only (T2+T3 only). This  
177 grouping based on PCA will be discussed later in association with exome analysis.

178

### 179 **Marker gene expression**

180 We examined the expression of several types of marker genes. We first looked at proliferation/cell cycle  
181 markers (S1 Appendix: **Figure S5**) and performed PCA to summarize the multiple expression levels (**Fig.**  
182 **3A**). Remarkably, most cells in the Anti-Epithelial group at T1 expressed high levels of proliferation- and  
183 cell cycle-related genes according to the PCA loading plot. In contrast, nearly all cells in the unnamed  
184 group at T3 showed a downregulation of the marker genes, so we termed the cell group Dormant. At T2,  
185 about half of the cells showed a downregulation of the proliferation/cell-cycle genes.

186 We next examined epithelial and mesenchymal markers (S1 Appendix: **Figure S5**). A PCA plot  
187 of the markers showed that expression of mesenchymal cell-related genes decreased with time (T2 and  
188 T3), with cells forming two groups (**Fig. 3B**): one (upper left) overlapping with some T1 Anti-Epithelial  
189 cells with decreased mesenchymal N-cadherin (*CDH2*) and fibronectin (*FNI*) levels; the other (middle  
190 right) group was composed only of T3 cells with decreased mesenchymal vimentin (*VIM*) and increased  
191 epithelial E-cadherin (*CDH1*) levels. These results suggest a similarity between the processes occurring at  
192 T2 and T3 and mesenchymal-epithelial transition (MET).

193 Stem cell and differentiation markers showed that over time, cells generally expressed more  
194 differentiation than stem cell markers (**Fig. 3C**; S1 Appendix: **Figure S5**). Nevertheless, a remarkable



195 variation across individual cells was also observed; for example, many T3 cells tended to express more  
196 differentiation markers, while others tended to express more stem cell markers. Among the markers for  
197 crypt base stem cells, *SOX9* appeared to be the most influential; *LGR5*, *OLFM4*, and *MSI1* were not  
198 substantially expressed. It seems that with time, cells differentiated into those expressing a marker for  
199 absorption cells (*KRT20*) and those for secretion cells (*MUC2*) in the digestive tract.

200 There was no remarkable change in the expression of drug efflux genes [28, 29] at any time point  
201 (**Fig. 2C**), although *ABCB1* expression was slightly lower in the T3 Dormant group (S1 Appendix: **Figure**  
202 **S5**) and *ABCE1* was downregulated at T2 and T3. There was variable expression of glycolysis-related  
203 gene *PDK1* [29] across all cells, irrespective of groups (**Fig. 2C**; S1 Appendix: **Figure S5**).

204

### 205 **Single-cell exome analysis**

206 Based on several indices from single-cell exome sequencing (S1 Appendix: **Figure S6**), we selected 21,  
207 23, and 23 cells out of the 23 T1, 24 T2, and 24 T3 cells for analysis. On average (expressed as the median  
208 [ $\pm$  inter quartile range] across selected cells), the number of mapped reads was  $1.2 \times 10^8$  ( $\pm 2.2 \times 10^7$ ),  
209 mapping rate was 76.6% ( $\pm 4.9\%$ ), coverage with  $> 0$  depth regions was 76.9% ( $\pm 34.2\%$ ), average depth  
210 was 43 ( $\pm 34.5$ ), Gini coefficient was 0.85 ( $\pm 0.15$ ), allelic drop-out (ADO) rate was 47.0 ( $\pm 36.1$ ), and  
211 number of called SNVs was 462 ( $\pm 313.5$ ). The false positive rate in single-cell sequencing was estimated  
212 to be  $0.1\text{--}1.1 \times 10^{-7}$  per chromosomal site, based on normal intestinal tract tissue samples from two mice  
213 and four single cells obtained from one of these samples (S1 Appendix: **Supplementary Results**). We  
214 compared the fractions of single cells with SNVs to the variant allele frequencies (VAFs) of the bulk-cell  
215 sequencing; in theory, the single-cell fractions should be equal to half of the VAFs. We confirmed a good  
216 concordance between these variables, although the cell fractions were slightly lower than those expected  
217 from bulk VAFs (S1 Appendix: **Figure S6**).

218 We first examined the bulk-cell sequence data. The T0.5 tissue had much fewer SNVs than the  
219 later stages (**Fig. 4A**), which suggests that DNA heterogeneity only weakly appeared soon (1.5 months)  
220 after culture initiation. The numbers of SNVs increased markedly from T0.5 to T1, a five-month period  
221 (**Fig. 4A**). Although these numbers decreased slightly at T2 before recovering at T3, they were all mostly

222 saturated at T1, T2, and T3. Thus, new SNVs were largely generated from T0.5 to T1, and most of these  
223 SNVs remained in the genome after T1 at the bulk-cell level (**Fig. 4B**).

224 We then used single-cell sequencing data to draw a multi-dimensional scaling (MDS) plot based  
225 on single-cell SNVs at polymorphic SNV sites (defined as SNVs with 10–35% bulk VAFs) (**Fig. 4C**). T1  
226 cells showed the greatest genetic divergence, whereas T2 and T3 cells showed convergence. This decrease  
227 in diversity was confirmed by a statistical significance of the diversity index (average distance from the  
228 centroid), where the bias due to ADO rates was taken into account by a bootstrapping test (**Fig. 4D**).

229 Interestingly, this diversity tendency was the complete opposite of the transcriptomic pattern (**Fig. 2A, B**).  
230 Although transitional, cells can be classified into three groups composed of T1 cells only (T1 main); T1,  
231 T2, and T3 cells (T1+T2+T3); and T2 and T3 cells (T2+T3 only) (**Fig. 4C**).

232

### 233 **Association with human cancer**

234 We used TCGA colorectal cancer data [24] to identify human samples with gene expression  
235 patterns similar to the groups of mouse single cells. The human sample clusters were separated from the  
236 mouse cell groups, but we found 94 (38.5%), 42 (17.2%), and 13 (5.3%) samples out of the 244 TCGA  
237 samples that were respectively close to the Anti-Epithelial, cGMP/GC, and Dormant mouse cell groups  
238 (**Fig. 5A**). TCGA Anti-Epithelial samples showed enhanced *REG* and repressed cGMP/GC gene  
239 expression; TCGA cGMP/GC samples showed the opposite pattern; and TCGA Dormant samples had  
240 both repressed *REG* and GC-related gene expression (**Fig. 5B**). TCGA cGMP/GC and TCGA Dormant  
241 samples tended to be more closely associated with metastasis than those with patterns similar to the Anti-  
242 Epithelial group (two-sided Fisher's exact test  $P = 0.04$ ; **Fig. 5C**). We determined that our mouse tumor  
243 cells were molecularly similar to cells of human colon adenocarcinoma classified as high microsatellite  
244 instability type (S1 Appendix: **Figure S7**; S1 Appendix; **Figure S8**; S1 Appendix: **Supplementary**  
245 **Results**).

246

247

248

249

250 **Discussion**

251 Our results suggest a scenario in which, once cancer cells accumulate a sufficient number of genetic  
252 alterations (SNVs/indels), they can adapt to drastic environmental changes, such as the shift from a 3D  
253 culture to a live mouse. Only by altering their transcriptional profiles, cancer cells generate new  
254 subpopulations of cells with ever increasing transcriptional heterogeneity. In turn, genetic heterogeneity  
255 decreases, possibly as a result of microscale natural selection that occurs during the environmental  
256 transition. Though expected, it is nonetheless surprising to see that this diversity was indeed generated  
257 from *one single cell*.

258 Because T1 cells express mesenchymal genes, they are considered as a late stage of tumor  
259 development, when typically they move out from the niches or microenvironment of intestinal crypts [30].  
260 For example, we did not observe the expression of *LGR5*, a stem cell marker and a tumor suppressor that  
261 delimits stem cell expansion in the niches; ablation of *LGR5* reduces cell-cell adhesion and induces  
262 invasion and metastasis [31-33]. Our observation that cells lose their mesenchymal-like phenotype and  
263 acquire epithelial-like characteristics after subcutaneous transplantation may be analogized to MET during  
264 metastasis.

265 There is a possibility that the observed subpopulations were derived from distinct genetic  
266 lineages. The RNA cell categories of T1 main (composed of the Anti-Epithelial cell group), T1+T2+T3  
267 (Anti-Epithelial cell group), and T2+T3 only (cGMP/GC and Dormant cell groups) in **Fig. 2D** correspond  
268 to the DNA cell categories of T1 main, T1+T2+T3, and T2+T3 only, respectively, in **Fig. 4C**. This  
269 suggests that the two subpopulations (cGMP/GC and Dormant) that emerged after transplantation were  
270 genetically distinct from the initial Anti-Epithelial group and that transcriptional differences between the  
271 cGMP/GC or Dormant groups and the Anti-Epithelial group were due to their genetic differences, though  
272 simultaneous single-cell sequencing of both DNA and RNA from the same cells([34], [35]) is required for  
273 further clarification.

274 Classically, cells that generate a tumor by subcutaneous transplantation are called tumor-initiating  
275 cells or cancer stem cells (CSCs) [29]. It is thought that differentiated cells die while CSCs can survive at  
276 the start of subcutaneous transplantation and 3D culture; then, CSCs re-generate differentiated cells. In our

277 transplantation approach, at the cell-population level we observed decreased expression of stem-cell  
278 markers and increased expression of differentiation markers over time, with varying degrees of expression  
279 across single cells. This suggests that once cells experience subcutaneous environments, CSCs that more  
280 efficiently generate differentiated cells may survive and prevail. Alternatively, contrary to naïve  
281 expectations, tumor cells expressing differentiation markers may also survive at the start of the  
282 transplantation and 3D culturing, supporting the idea that differentiated cells that experience MET can  
283 colonize and are not necessarily generated from CSCs.

284 Clinically, the proportion of TCGA samples with metastasis in the Dormant and cGMP/GC  
285 groups was higher than in the TCGA Anti-Epithelial group (**Fig. 5C**). This is probably because the  
286 appearance of the former two subgroups, and resultant increased ITH, may be a sign for later stages of  
287 tumor progression. This is surprising because mouse expression patterns decomposed by single-cell  
288 sequencing may provide us with clinical significance, though further investigations including single-cell  
289 sequencing of the TCGA samples will be necessary to clarify a relationship between the tumor  
290 progression and metastasis.

291 Recently, more fine-scale single-cell sequencing technology, such as 10X/Drop-Seq, has emerged  
292 for RNA-seq, enabling researchers to capture tens of thousands of cells. Although the number of cells we  
293 addressed was relatively small compared to that technology, we believe that we successfully captured a  
294 major part of the heterogeneity constructed by cell clones, constituting as small as ~2% (an inverse  
295 number of 42, 42, and 51 cells at T1, T2, and T3) of the tumor cell population. Nevertheless, to investigate  
296 rarer cells, for example, CSCs related to the above issue, 10X/Drop-Seq will be needed.

297 We demonstrated that time-series ITH analysis by single-cell DNA and RNA sequencing for a  
298 mouse model is able to provide clinical insights, such as finding associations with MET and metastasis,  
299 and the birth of transcriptional subpopulations of cells with sufficient genetic alterations at a drastic micro-  
300 environmental change. It will be crucial to examine how such genetic changes accumulate in the earlier  
301 stages of tumorigenesis and how transcriptional subpopulations develop to increase malignancy in the  
302 further later stages of tumor progression.

303

304 **Materials and Methods**

305 **Ethics approval and consent to practice**

306 Animal studies were carried out according to the Guideline for Animal Experiments established by the  
307 Committee for Ethics in Animal Experimentation of the National Cancer Center (T10-033-M05), which  
308 meets the ethical standards required by law and guidelines for animal experimentation in Japan. All  
309 sacrificed mice were anesthetized by inhalation of isoflurane. And cervical dislocation was used as a  
310 euthanasia method.

311

312 **Organoid culture of small intestinal cells and lentiviral transduction**

313 C57BL/6J mice and BALB/cAnu/nu immune-deficient nude mice were purchased from CLEA Japan  
314 (Tokyo, Japan). The small intestine was harvested from wild-type male C57BL/6J mice at 3–5 weeks of  
315 age. Crypts were purified and dissociated into single cells, which were then put into serum-free Matrigel-  
316 based organoid culture as previously described [22, 36]. Transduced organoids were maintained in culture  
317 medium lacking R-spondin 1. Single cell-derived shAPC-transduced organoids were obtained by limiting  
318 dilution of dissociated organoids in a 96-well plate. Organoids composed of  $5 \times 10^5$  cells were mixed with  
319 200  $\mu$ l of Matrigel and injected into one side of the dorsal skin of nude mice, while uninjected cells were  
320 maintained in 3D cultures for later use.

321

322 **Analysis of subcutaneous tumors in nude mice**

323 Palpable tumors from the injection sites were harvested for histological examination or cell culture. Half  
324 of the subcutaneous tumors were formalin-fixed, paraffin-embedded, and sectioned at a thickness of 5  $\mu$ m,  
325 followed by HE staining to assess histological features. The other half of the tumors were minced and  
326 digested to recover cells as described previously (22), then seeded onto solidified Matrigel to resume  
327 organoid culture. We defined the time points as follows; before the first transplantation was time point T1,  
328 and two time points following the first and second transplantations were T2 and T3, respectively (**Fig.**  
329 **1A**).

330

331 **Single-cell transcriptome and exome sequencing**

332 Cultured mouse organoids derived from a single cell were harvested and treated with Accumax  
333 (Innovative Cell Technologies, AM105) to generate a single-cell suspension. To capture cells and extract  
334 RNA or DNA from a single cell, the cell suspensions ( $4.4 \times 10^5$  cells/ml) were loaded on a C1 Single Cell  
335 Auto Prep System (Fluidigm, C1) with medium-sized (10–17  $\mu\text{m}$ ) microfluidic chips for 96 cells.  
336 Approximately 1300 cells were applied to each chip. Captured cells were imaged on a BZ-9000 digital  
337 microscope (Keyence, BZ-9000) and a visual inspection was performed to determine whether a single cell  
338 was captured in each well of the chip. Capture efficiency for a single cell was determined as 71–82%.

339 For single-cell whole transcriptome (RNA) sequencing, captured cells were lysed on the chip  
340 using a C1 Single-Cell Auto Prep Reagent Kit for mRNA Seq (Fluidigm, 100-6201). Full-length cDNA  
341 fragments were transcribed and amplified from poly-A RNA in each single cell using the SMARTer Ultra  
342 Low RNA kit (Takara Bio, 634832). Tagmentation of cDNA was performed and sequencing libraries  
343 were prepared using the Nextera XT DNA sample preparation kit (Illumina, FC-131-1096) according to  
344 the manufacturer's protocol. Up to 52 independent single-cell RNA-seq libraries were prepared for  
345 sequencing.

346 For single-cell DNA sequencing, genomic DNA was prepared from single cells using the C1  
347 Single-cell Auto Prep Reagent Kit for DNA Seq (Fluidigm, 100-7357) and whole genome amplification  
348 was achieved by multiple displacement amplification with Phi29 DNA polymerase and the Illustra  
349 GenomiPhi v.2 kit (GE Healthcare, 25660032). Amplified genomic DNA (70 ng) was used to generate  
350 exome sequence libraries using the Hyper Prep kit (Kapa Biosystems, KK8504), SureSelect Target  
351 Enrichment kit (Agilent Technologies, 931171), and SureSelect XT Mouse All Exon v.1 probe (Agilent  
352 Technologies, 5190-4642).

353

354 **Bulk-cell transcriptome and exome sequencing**

355 Among the cells that were not used for single-cell capture with the C1 system, suspensions of about 200  
356 cells were subjected to whole transcriptome (RNA) sequencing for bulk-cell RNA-seq (T1, T2, and T3  
357 samples). The sequencing libraries were prepared using the same reagents as the single cell RNA-seq. As

358 control bulk cells, normal intestinal crypt epithelial cells from two wild-type mice of the same strain were  
359 grown in the 3D culture system for seven days, then harvested and lysed for total RNA preparation using  
360 the miRNAeasy Mini kit (Qiagen, 217004). RNA-seq libraries for control bulk RNA were generated using  
361 the SureSelect Strand-specific kit (Agilent Technologies, G9691B). Bulk DNA from over  $1 \times 10^5$  cells  
362 was obtained from the cell culture (T0.5 sample, 1.5 months after culture initiation) and the remaining  
363 cells in single-cell capture (T1, T2, and T3 samples) using the QIAamp DNA Mini kit (Qiagen, 51304),  
364 and 500 ng of DNA were used to construct exome sequencing libraries with the same reagents as the  
365 single cell DNA-seq.

366

### 367 **Sequencing**

368 All the sequencing libraries were subjected to paired-end sequencing of 101-bp fragments on the  
369 HiSeq2500 DNA sequencer (Illumina, SY-401-2501).

370

### 371 **Transcripts per kilobase million (TPM) calculation for single and bulk cells**

372 The procedure for calculating TPM is summarized in S1 Appendix: **Figure S9**. Specifically, sequence  
373 reads were quality-filtered and trimmed using PrinSeq [37], and then used as input for quality-check by  
374 FastQC (<https://www.bioinformatics.babraham.ac.uk/projects/fastqc/>). We used the following parameters:  
375 --min\_len 30 (removing reads  $\leq 30$  bases); --min\_qual\_mean 20 (average read quality  $\leq 20$ ); --  
376 trim\_tail\_right 5, --trim\_tail\_left 5 (trim bases if the 3' and 5' end poly A/Ts are  $\geq$  five bases); and --  
377 trim\_qual\_right 20, --trim\_qual\_left 20 (trim 3' or 5' end for read quality  $\leq 20$ ). Paired-end reads were  
378 mapped to the University of California Santa Cruz mouse genome sequence (mm10) using Bowtie2 [38]  
379 built in RSEM [39]. Expression levels (in TPM) were estimated by RSEM using the command rsem-  
380 calculate-expression with the parameters --estimate-rspd, --paired-end, --bowtie2, -p 30, and --ci-memory  
381 10192. We removed eight T1 cell samples due to an excessive number of genes ( $\geq 5,200$ ) with TPM  $\geq 10$   
382 or with too few unique mapping reads ( $< 2.2 \times 10^6$ ). We also removed two samples with unique mapping  
383 rates that were too low ( $< 20\%$ ) and discarded genes with low expression levels ( $\leq 10$  TPM) across all cell  
384 samples, leaving 14,258 out of 32,732 genes for analysis.

385

### 386 **Detection of highly variable genes**

387 To detect genes with variable expression levels across cells, we defined highly variable genes according to  
388 the *CV*, corrected in the locally weighted scatterplot smoothing (LOWESS) method using the “lowess”  
389 function in R. To fit a single LOWESS curve across all ranges, we divided average expression level data  
390 into three ranges:  $< 4$ ,  $4-8.5$ , and  $> 8.5$ . *cCV* values were yielded by dividing *CV* values by the value of  
391 the upper variability band ( $\pm 1.96$  times the standard deviation) of smoothed curve estimated using  
392 “loess.sd” in the “msir” package. Because of the large bias in original *CV* values against low average  
393 expression levels, only those with *cCV* values  $> 1.3$  and high average expression levels ( $\log_2[\text{TPM}+1] \geq$   
394  $4$ ) were defined as highly variable genes.

395

### 396 **PCA of RNA data**

397 PCA was carried out for gene expression levels ( $\log_2[\text{TPM} + 1]$ ) without scaling. For the loading analysis  
398 of marker genes, we used the following genes; *MKI67* and *PCNA* for positive markers and *CDKN1A* for a  
399 negative marker for cell proliferation in colorectal cancer [40]. *CCND2* and *CCND3* for positive markers  
400 for cell cycle in this cancer [41]. E-cadherin (*CDH1*) for an epithelial marker; N-cadherin (*CDH2*),  
401 vimentin (*VIM*), and fibronectin (*FNI*) for mesenchymal markers [42]. *LGR5*, *ASCL2*, *OLFM4*, *MSI1*, and  
402 *SOX9* for crypt base stem cell markers, *HOPX*, *BMII*, and *LRIG1* for +4 (position from the crypt base)  
403 stem cell markers, *AQP8*, *CARI*, *CEACAM1*, *KRT20*, and *SLC26A3* for differentiation makers for  
404 absorption cells, and *MUC2*, *SPINK1* for differentiation markers for secretion cells [43].

405

### 406 **Hierarchical clustering, correlation plot, and heatmap analysis**

407 For hierarchical clustering, we used the “hclust” function in the “stats” package of R software, where we  
408 calculated the Euclidean distance of expression levels ( $\log_2[\text{TPM} + 1]$ ) of all highly variable genes  
409 between cells and used the Ward method for agglomeration. We generated correlation plots of highly  
410 variable genes using the “corrplot” function in the R “corrplot” package, where we used the Ward method  
411 for agglomeration. We divided genes into three clusters based on these hierarchical clustering results using



412 the “addrect = 3” option. A heatmap was generated using the “heatmap.2” function in the “ggplot2”  
413 package. In the heatmap, cells were arranged according to their order in the dendrogram described above  
414 and genes were arranged according to their order in the correlation plot of highly variable genes.

415

#### 416 **Gene set enrichment analysis**

417 DAVID [44] was used to identify gene ontologies (biological processes) in which genes of an identified  
418 group were enriched ( $P < 0.01$ ).

419

#### 420 **SNV detection for single and bulk cells**

421 For bulk-cell data, we used a previously described method for SNV/indel calling [45] by cisCall with cell-  
422 line/frozen parameters [46], mapping reads to the mouse genome (mm9) by BWA [47]. We filtered out  
423 PCR-duplicated reads as well as reads and bases with low mapping and base qualities. The remaining  
424 variants were further filtered statistically using Fisher’s exact test to compare fore- and background  
425 samples, which came from two different individuals of the same pure C57BL/6J strain. We verified the  
426 negligible effects of using a different individual for the background sample (**Supplementary Results**). A  
427 series of filters was used to remove suspicious variant calls, such as those related to misalignments.  
428 Variants for which allele frequencies were significantly greater than 1% in the binomial test were retained.  
429 The procedure is summarized in S1 Appendix: **Figure S9**.

430 For single-cell sequencing data, we called SNVs only at SNV sites called in bulk-cell sequencing  
431 data. Specifically, we counted nucleotide bases with high qualities ( $\text{mapQ} \geq 20$ ,  $\text{BaseQ} \geq 10$ ) in single-cell  
432 sequencing data as well as in background data (same as those used in bulk-cell SNV calling) with the  
433 Samtools mpileup function [48]. We then selected variants with the largest  $\chi^2$  test statistic (with Yates’s  
434 correction) among all possible variants at each position to identify those that were most likely to differ  
435 between single-cell and background data. We required a variant count  $\geq 2$  and VAF  $\geq 2\%$  for such variants  
436 in single-cell data. We then selected variants that overlapped with SNV sites called in bulk-cell data.

437

#### 438 **Detecting mutation in cancer-related genes**

439 We investigated nonsynonymous mutations in cancer-related genes contained in Tier1 in COSMIC Cancer  
440 Gene Census [25].

441

#### 442 **MDS of DNA data and the diversity index**

443 We performed MDS from the cell  $\times$  site matrix composed of zero and one, which respectively represent  
444 the absence and presence of SNVs (both synonymous and non-synonymous SNVs) and NA, which  
445 represents an undetermined call due to shallow depth. We assigned zero to non-called sites as the true  
446 negative when those sites had depths  $\geq 30$  and assigned NA to non-called sites when the depth was  $< 30$ .  
447 We only used SNV sites where a variant was called in at least one cell and the VAFs at the same sites in  
448 bulk data ranged from 10–35% (polymorphic) for at least one time point. We removed cells and sites (two  
449 each) with too few or too many NAs, yielding 104 sites and 69 cells. Using this 0/1/NA matrix, we  
450 calculated the  $p$ -distance (proportion of different sites) used in molecular evolution without using NA, and  
451 then performed MDS.

452 The diversity index was calculated as the average Euclidian distance from the centroid over cells  
453 in the MDS space, where we used up to the sixth dimension because of a sudden drop in the eigenvalues  
454 over this dimension. To calculate the statistical significance of differences between cell groups, we used a  
455 bootstrapping approach in which we randomly re-sampled cells' sequences from the 0/1/NA matrix of  
456 each cell group 10,000 times and performed the same MDS as in the observed data for each replicate. We  
457 then calculated the diversity index for each replicate to determine the 95% confidence interval and  
458 standard deviation for each cell group.

459

#### 460 **Lorenz curve and Gini coefficients**

461 A Lorenz curve was generated with read depth at each site using the “Lc” function in the “ineq” package  
462 of R software. To quantify uniformity, the Gini coefficient was calculated using the “Gini” function in the  
463 “ineq” package.

464

465

## 466 **ADO rate**

467 The ADO rate was defined as the rate of homozygous sites in single-cell samples where the bulk sample  
468 was heterozygous (defined as sites where VAFs were 45–55%) at the same nucleotide site. We removed  
469 outlier cells with high ADO rates at each time point (one cell each with an ADO rate > 80% at T2 and T3).

470

## 471 **Average copy number**

472 The average copy number (ACN) was calculated as follows:

$$473 \quad \text{ACN} = 2 \times \left\{ \left( 2^{\frac{\sum (\log_2 R_i \times L_i)}{\sum L_i}} \right) \times \left( \frac{\sum L_i}{GL} \right) + \left( 1 - \frac{\sum L_i}{GL} \right) \right\}, \quad (1),$$

474 where  $\log_2 R_i$ ,  $L_i$ , and  $GL$  represent the log-ratio of CNA segment  $i$ , length of CNA segment  $i$ , and genome  
475 length (50 Gb for mouse, 40 Gb for human), respectively. CNAs of mouse bulk data were detected as  
476 previously described [45]. Briefly, segments were called for the same fore- and background BAM files as  
477 those used in SNV with Exome CNV [49] and VarScan2 [50]. Overlapping segments called by both tools  
478 were used as CNA segments.

479

## 480 **Random Forest**

481 Random Forest was used to generate the classifier for the histological type and MSI status of human  
482 cancer. We used gene expression levels, number of SNVs in each gene, total mutation (SNV/indel)  
483 number, and mutation density (total number of SNVs/indels divided by target region size) as explanatory  
484 variables. Using TCGA data [24], we first filtered out unimportant explanatory variables using the two-  
485 sided Kruskal-Wallis test with  $P$  values of  $5.00 \times 10^{-5}$  and  $1.00 \times 10^{-9}$  yielding 171 and 78 variables for  
486 histological type and MSI status, respectively. These were used to train a Random Forest classifier with  
487 the “randomForest” function in the “randomForest” package of R software, with the options  $n\text{tree} = 10000$   
488 (setting the number of trees to grow to 1000) and  $m\text{try} = 5$  (setting the number of variables randomly  
489 sampled to five). Using the created classifier, the same explanatory variables for mouse data were used to  
490 classify each feature in the mouse model.

## 491 MDS of mouse cell and TCGA samples

492 We first identified TCGA samples with gene expression patterns similar to the mouse single-cell groups.

493 For that purpose, we calculated a normalized 1- $r$  distance as follows:

$$494 \quad d_{h,G} = \frac{1 - r_{h,m^G}}{\text{MADN}(1 - r_{m_i^G, m^G})}, \quad (2),$$

495 where  $r_{i,j}$  is a Pearson correlation coefficient between vectors  $i$  and  $j$  of expression levels in log across

496 highly variable genes,  $h$  represents a human TCGA sample,  $G$  represents a mouse single-cell group,  $m_i^G$

497 represents mouse single cell  $i$  in group  $G$ ,  $m^G$  represents the centroid of  $m_i^G$  that was calculated by the

498 median, and MADN represents the median absolute deviation adjusted by a factor for asymptotically

499 normal consistency. We calculated this distance from a TCGA sample to every mouse group and selected

500 a TCGA sample for those whose minimum distance across the groups was less than 4.05 and the

501 difference between the first and second minimum distances was larger than 0.31. For selected TCGA and

502 all mouse single-cell samples, MDS was performed based on the distance of 1- $r$ .

503

504

505

506

507

508

509

510

511

512

513

514

515

516

517 **Availability of data and materials**

518 Sequence data used in this study are available in the DDBJ Sequenced Read Archive under Accession  
519 Nos. DRX100507-DRX100729. [These data are held until the acceptance. URL will be added after the  
520 data release.]

521

522 **Competing interests**

523 None to be declared.

524

525 **Authors' contributions**

526 Y.A., Y.H., T.S., and M.K. designed the study. Y.A., T.M., T.I., and Y.H. performed the experiments.

527 H.O., E.F., D.N., H.N., M.N., and M.K. analyzed the data. H.O., Y.A., E.F., T.I., Y.H., and M.K. wrote

528 the manuscript. D. S., K.M., K.O., and T.S. reviewed the manuscript. M.K. led the project.

529

530 **Acknowledgements**

531 We thank Joe Miyamoto, Asmaa Elzawahry, Iku Orihashi, Masako Ochiai, and Wakako Mukai for

532 technical assistance, and Ryuichi Sugino and Daniel A. Vasco for useful suggestions.

533

534

535

536

537

538

539

540

541

542

543

544

545

546 **References**

- 547 1. Almendro V, Marusyk A, Polyak K. Cellular heterogeneity and molecular evolution in cancer.  
548 *Annu Rev Pathol.* 2013;8:277-302. Epub 2012/10/25. doi: 10.1146/annurev-pathol-020712-  
549 163923. PubMed PMID: 23092187.
- 550 2. McGranahan N, Swanton C. Clonal Heterogeneity and Tumor Evolution: Past, Present, and the  
551 Future. *Cell.* 2017;168(4):613-28. Epub 2017/02/12. doi: 10.1016/j.cell.2017.01.018. PubMed  
552 PMID: 28187284.
- 553 3. Jamal-Hanjani M, Wilson GA, McGranahan N, Birkbak NJ, Watkins TBK, Veeriah S, et al.  
554 Tracking the Evolution of Non-Small-Cell Lung Cancer. *N Engl J Med.* 2017;376(22):2109-21.  
555 Epub 2017/04/27. doi: 10.1056/NEJMoa1616288. PubMed PMID: 28445112.
- 556 4. Dagogo-Jack I, Shaw AT. Tumour heterogeneity and resistance to cancer therapies. *Nat Rev Clin*  
557 *Oncol.* 2018;15(2):81-94. Epub 2017/11/09. doi: 10.1038/nrclinonc.2017.166. PubMed PMID:  
558 29115304.
- 559 5. Maley CC, Galipeau PC, Finley JC, Wongsurawat VJ, Li X, Sanchez CA, et al. Genetic clonal  
560 diversity predicts progression to esophageal adenocarcinoma. *Nat Genet.* 2006;38(4):468-73.  
561 Epub 2006/03/28. doi: 10.1038/ng1768. PubMed PMID: 16565718.
- 562 6. Nowell PC. The clonal evolution of tumor cell populations. *Science.* 1976;194(4260):23-8. Epub  
563 1976/10/01. PubMed PMID: 959840.
- 564 7. Fulawka L, Donizy P, Halon A. Cancer stem cells--the current status of an old concept: literature  
565 review and clinical approaches. *Biol Res.* 2014;47:66. Epub 2015/02/28. doi: 10.1186/0717-6287-  
566 47-66. PubMed PMID: 25723910; PubMed Central PMCID: PMCPMC4335556.
- 567 8. Kreso A, Dick JE. Evolution of the cancer stem cell model. *Cell Stem Cell.* 2014;14(3):275-91.  
568 Epub 2014/03/13. doi: 10.1016/j.stem.2014.02.006. PubMed PMID: 24607403.
- 569 9. Davis A, Gao R, Navin N. Tumor evolution: Linear, branching, neutral or punctuated? *Biochim*  
570 *Biophys Acta Rev Cancer.* 2017;1867(2):151-61. Epub 2017/01/23. doi:  
571 10.1016/j.bbcan.2017.01.003. PubMed PMID: 28110020; PubMed Central PMCID:  
572 PMCPMC5558210.

- 573 10. Williams MJ, Werner B, Heide T, Curtis C, Barnes CP, Sottoriva A, et al. Quantification of  
574 subclonal selection in cancer from bulk sequencing data. *Nat Genet.* 2018;50(6):895-903. Epub  
575 2018/05/29. doi: 10.1038/s41588-018-0128-6. PubMed PMID: 29808029.
- 576 11. Navin N, Kendall J, Troge J, Andrews P, Rodgers L, McIndoo J, et al. Tumour evolution inferred  
577 by single-cell sequencing. *Nature.* 2011;472(7341):90-4. Epub 2011/03/15. doi:  
578 10.1038/nature09807. PubMed PMID: 21399628; PubMed Central PMCID: PMC4504184.
- 579 12. Wang Y, Waters J, Leung ML, Unruh A, Roh W, Shi X, et al. Clonal evolution in breast cancer  
580 revealed by single nucleus genome sequencing. *Nature.* 2014;512(7513):155-60. Epub  
581 2014/08/01. doi: 10.1038/nature13600. PubMed PMID: 25079324; PubMed Central PMCID:  
582 PMC4158312.
- 583 13. Patel AP, Tirosh I, Trombetta JJ, Shalek AK, Gillespie SM, Wakimoto H, et al. Single-cell RNA-  
584 seq highlights intratumoral heterogeneity in primary glioblastoma. *Science.* 2014;344(6190):1396-  
585 401. Epub 2014/06/14. doi: 10.1126/science.1254257. PubMed PMID: 24925914; PubMed  
586 Central PMCID: PMC4123637.
- 587 14. Tirosh I, Venteicher AS, Hebert C, Escalante LE, Patel AP, Yizhak K, et al. Single-cell RNA-seq  
588 supports a developmental hierarchy in human oligodendroglioma. *Nature.* 2016;539(7628):309-  
589 13. Epub 2016/11/05. doi: 10.1038/nature20123. PubMed PMID: 27806376; PubMed Central  
590 PMCID: PMC465819.
- 591 15. Suzuki A, Matsushima K, Makinoshima H, Sugano S, Kohno T, Tsuchihara K, et al. Single-cell  
592 analysis of lung adenocarcinoma cell lines reveals diverse expression patterns of individual cells  
593 invoked by a molecular target drug treatment. *Genome Biol.* 2015;16:66. Epub 2015/04/19. doi:  
594 10.1186/s13059-015-0636-y. PubMed PMID: 25887790; PubMed Central PMCID:  
595 PMC4450998.
- 596 16. Gawad C, Koh W, Quake SR. Dissecting the clonal origins of childhood acute lymphoblastic  
597 leukemia by single-cell genomics. *Proc Natl Acad Sci U S A.* 2014;111(50):17947-52. Epub  
598 2014/11/27. doi: 10.1073/pnas.1420822111. PubMed PMID: 25425670; PubMed Central PMCID:  
599 PMC4273416.

- 600 17. Kim KT, Lee HW, Lee HO, Kim SC, Seo YJ, Chung W, et al. Single-cell mRNA sequencing  
601 identifies subclonal heterogeneity in anti-cancer drug responses of lung adenocarcinoma cells.  
602 *Genome Biol.* 2015;16:127. Epub 2015/06/19. doi: 10.1186/s13059-015-0692-3. PubMed PMID:  
603 26084335; PubMed Central PMCID: PMC4506401.
- 604 18. Hou Y, Song L, Zhu P, Zhang B, Tao Y, Xu X, et al. Single-cell exome sequencing and  
605 monoclonal evolution of a JAK2-negative myeloproliferative neoplasm. *Cell.* 2012;148(5):873-  
606 85. Epub 2012/03/06. doi: 10.1016/j.cell.2012.02.028. PubMed PMID: 22385957.
- 607 19. Xu X, Hou Y, Yin X, Bao L, Tang A, Song L, et al. Single-cell exome sequencing reveals single-  
608 nucleotide mutation characteristics of a kidney tumor. *Cell.* 2012;148(5):886-95. Epub  
609 2012/03/06. doi: 10.1016/j.cell.2012.02.025. PubMed PMID: 22385958.
- 610 20. Kato M, Vasco DA, Sugino R, Narushima D, Krasnitz A. Sweepstake evolution revealed by  
611 population-genetic analysis of copy-number alterations in single genomes of breast cancer. *R Soc*  
612 *Open Sci.* 2017;4(9):171060. doi: 10.1098/rsos.171060. PubMed PMID: 28989791; PubMed  
613 Central PMCID: PMC5627131.
- 614 21. Eirew P, Steif A, Khattra J, Ha G, Yap D, Farahani H, et al. Dynamics of genomic clones in breast  
615 cancer patient xenografts at single-cell resolution. *Nature.* 2015;518(7539):422-6. Epub  
616 2014/12/04. doi: 10.1038/nature13952. PubMed PMID: 25470049; PubMed Central PMCID:  
617 PMC4864027.
- 618 22. Onuma K, Ochiai M, Orihashi K, Takahashi M, Imai T, Nakagama H, et al. Genetic reconstitution  
619 of tumorigenesis in primary intestinal cells. *Proc Natl Acad Sci U S A.* 2013;110(27):11127-32.  
620 Epub 2013/06/19. doi: 10.1073/pnas.1221926110. PubMed PMID: 23776211; PubMed Central  
621 PMCID: PMC3703980.
- 622 23. Itzkovitz S, Blat IC, Jacks T, Clevers H, van Oudenaarden A. Optimality in the development of  
623 intestinal crypts. *Cell.* 2012;148(3):608-19. Epub 2012/02/07. doi: 10.1016/j.cell.2011.12.025.  
624 PubMed PMID: 22304925; PubMed Central PMCID: PMC3696183.
- 625 24. Cancer Genome Atlas N. Comprehensive molecular characterization of human colon and rectal  
626 cancer. *Nature.* 2012;487(7407):330-7. Epub 2012/07/20. doi: 10.1038/nature11252. PubMed



- 627 PMID: 22810696; PubMed Central PMCID: PMCPMC3401966.
- 628 25. Futreal PA, Coin L, Marshall M, Down T, Hubbard T, Wooster R, et al. A census of human  
629 cancer genes. *Nature Reviews Cancer*. 2004;4:177. doi: 10.1038/nrc1299
- 630 26. Fajardo AM, Piazza GA, Tinsley HN. The role of cyclic nucleotide signaling pathways in cancer:  
631 targets for prevention and treatment. *Cancers (Basel)*. 2014;6(1):436-58. Epub 2014/03/01. doi:  
632 10.3390/cancers6010436. PubMed PMID: 24577242; PubMed Central PMCID:  
633 PMCPMC3980602.
- 634 27. Lubbe WJ, Zhou ZY, Fu W, Zuzga D, Schulz S, Fridman R, et al. Tumor epithelial cell matrix  
635 metalloproteinase 9 is a target for antimetastatic therapy in colorectal cancer. *Clin Cancer Res*.  
636 2006;12(6):1876-82. Epub 2006/03/23. doi: 10.1158/1078-0432.CCR-05-2686. PubMed PMID:  
637 16551873.
- 638 28. Li CJ, Zhang X, Fan GW. Updates in colorectal cancer stem cell research. *J Cancer Res Ther*.  
639 2014;10 Suppl:233-9. Epub 2015/02/20. doi: 10.4103/0973-1482.151449. PubMed PMID:  
640 25693926.
- 641 29. Qureshi-Baig K, Ullmann P, Haan S, Letellier E. Tumor-Initiating Cells: a criTICal review of  
642 isolation approaches and new challenges in targeting strategies. *Mol Cancer*. 2017;16(1):40. Epub  
643 2017/02/18. doi: 10.1186/s12943-017-0602-2. PubMed PMID: 28209178; PubMed Central  
644 PMCID: PMCPMC5314476.
- 645 30. Batlle E, Clevers H. Cancer stem cells revisited. *Nat Med*. 2017;23(10):1124-34. Epub  
646 2017/10/07. doi: 10.1038/nm.4409. PubMed PMID: 28985214.
- 647 31. Walker F, Zhang HH, Odorizzi A, Burgess AW. LGR5 is a negative regulator of tumourigenicity,  
648 antagonizes Wnt signalling and regulates cell adhesion in colorectal cancer cell lines. *PLoS One*.  
649 2011;6(7):e22733. Epub 2011/08/11. doi: 10.1371/journal.pone.0022733. PubMed PMID:  
650 21829496; PubMed Central PMCID: PMCPMC3145754.
- 651 32. Carmon KS, Gong X, Yi J, Wu L, Thomas A, Moore CM, et al. LGR5 receptor promotes cell-cell  
652 adhesion in stem cells and colon cancer cells via the IQGAP1-Rac1 pathway. *J Biol Chem*.  
653 2017;292(36):14989-5001. Epub 2017/07/26. doi: 10.1074/jbc.M117.786798. PubMed PMID:

- 654 28739799; PubMed Central PMCID: PMCPMC5592675.
- 655 33. Zhou X, Geng L, Wang D, Yi H, Talmon G, Wang J. R-Spondin1/LGR5 Activates TGFbeta  
656 Signaling and Suppresses Colon Cancer Metastasis. *Cancer Res.* 2017;77(23):6589-602. Epub  
657 2017/09/25. doi: 10.1158/0008-5472.CAN-17-0219. PubMed PMID: 28939678.
- 658 34. Dey SS, Kester L, Spanjaard B, Bienko M, van Oudenaarden A. Integrated genome and  
659 transcriptome sequencing of the same cell. *Nat Biotechnol.* 2015;33(3):285-9. Epub 2015/01/20.  
660 doi: 10.1038/nbt.3129. PubMed PMID: 25599178; PubMed Central PMCID: PMCPMC4374170.
- 661 35. Macaulay IC, Haerty W, Kumar P, Li YI, Hu TX, Teng MJ, et al. G&T-seq: parallel sequencing  
662 of single-cell genomes and transcriptomes. *Nat Methods.* 2015;12(6):519-22. Epub 2015/04/29.  
663 doi: 10.1038/nmeth.3370. PubMed PMID: 25915121.
- 664 36. Maru Y, Orihashi K, Hippo Y. Lentivirus-Based Stable Gene Delivery into Intestinal Organoids.  
665 *Methods Mol Biol.* 2016;1422:13-21. Epub 2016/06/02. doi: 10.1007/978-1-4939-3603-8\_2.  
666 PubMed PMID: 27246018.
- 667 37. Schmiieder R, Edwards R. Quality control and preprocessing of metagenomic datasets.  
668 *Bioinformatics.* 2011;27(6):863-4. Epub 2011/02/01. doi: 10.1093/bioinformatics/btr026. PubMed  
669 PMID: 21278185; PubMed Central PMCID: PMCPMC3051327.
- 670 38. Langmead B, Salzberg SL. Fast gapped-read alignment with Bowtie 2. *Nat Methods.*  
671 2012;9(4):357-9. Epub 2012/03/06. doi: 10.1038/nmeth.1923. PubMed PMID: 22388286;  
672 PubMed Central PMCID: PMCPMC3322381.
- 673 39. Li B, Dewey CN. RSEM: accurate transcript quantification from RNA-Seq data with or without a  
674 reference genome. *BMC Bioinformatics.* 2011;12:323. Epub 2011/08/06. doi: 10.1186/1471-  
675 2105-12-323. PubMed PMID: 21816040; PubMed Central PMCID: PMCPMC3163565.
- 676 40. Whitfield ML, George LK, Grant GD, Perou CM. Common markers of proliferation. *Nat Rev*  
677 *Cancer.* 2006;6(2):99-106. Epub 2006/02/24. doi: 10.1038/nrc1802. PubMed PMID: 16491069.
- 678 41. Tominaga O, Nita ME, Nagawa H, Fujii S, Tsuruo T, Muto T. Expressions of cell cycle regulators  
679 in human colorectal cancer cell lines. *Jpn J Cancer Res.* 1997;88(9):855-60. Epub 1997/11/25.  
680 PubMed PMID: 9369933.

- 681 42. Weinberg R. The biology of cancer: Garland science; 2013.
- 682 43. Hong SN, Dunn JC, Stelzner M, Martin MG. Concise Review: The Potential Use of Intestinal  
683 Stem Cells to Treat Patients with Intestinal Failure. *Stem Cells Transl Med.* 2017;6(2):666-76.  
684 Epub 2017/02/14. doi: 10.5966/sctm.2016-0153. PubMed PMID: 28191783; PubMed Central  
685 PMCID: PMC5442796.
- 686 44. Huang da W, Sherman BT, Lempicki RA. Bioinformatics enrichment tools: paths toward the  
687 comprehensive functional analysis of large gene lists. *Nucleic Acids Res.* 2009;37(1):1-13. Epub  
688 2008/11/27. doi: 10.1093/nar/gkn923. PubMed PMID: 19033363; PubMed Central PMCID:  
689 PMCPMC2615629.
- 690 45. Takahashi T, Elzawahry A, Mimaki S, Furukawa E, Nakatsuka R, Nakamura H, et al. Genomic  
691 and transcriptomic analysis of imatinib resistance in gastrointestinal stromal tumors. *Genes  
692 Chromosomes Cancer.* 2017;56(4):303-13. Epub 2016/12/21. doi: 10.1002/gcc.22438. PubMed  
693 PMID: 27997714; PubMed Central PMCID: PMCPMC5324566.
- 694 46. Kato M, Nakamura H, Nagai M, Kubo T, Elzawahry A, Totoki Y, et al. A computational tool to  
695 detect DNA alterations tailored to formalin-fixed paraffin-embedded samples in cancer clinical  
696 sequencing. *Genome Med.* 2018;10(1):44. Epub 2018/06/09. doi: 10.1186/s13073-018-0547-0.  
697 PubMed PMID: 29880027; PubMed Central PMCID: PMCPMC5992758.
- 698 47. Li H, Durbin R. Fast and accurate short read alignment with Burrows-Wheeler transform.  
699 *Bioinformatics.* 2009;25(14):1754-60. Epub 2009/05/20. doi: 10.1093/bioinformatics/btp324.  
700 PubMed PMID: 19451168; PubMed Central PMCID: PMC2705234.
- 701 48. Li H, Handsaker B, Wysoker A, Fennell T, Ruan J, Homer N, et al. The Sequence Alignment/Map  
702 format and SAMtools. *Bioinformatics.* 2009;25(16):2078-9. doi: 10.1093/bioinformatics/btp352.  
703 PubMed PMID: 19505943; PubMed Central PMCID: PMCPMC2723002.
- 704 49. Sathirapongsasuti JF, Lee H, Horst BA, Brunner G, Cochran AJ, Binder S, et al. Exome  
705 sequencing-based copy-number variation and loss of heterozygosity detection: ExomeCNV.  
706 *Bioinformatics.* 2011;27(19):2648-54. Epub 2011/08/11. doi: 10.1093/bioinformatics/btr462.  
707 PubMed PMID: 21828086; PubMed Central PMCID: PMCPMC3179661.

708 50. Koboldt DC, Zhang Q, Larson DE, Shen D, McLellan MD, Lin L, et al. VarScan 2: somatic  
709 mutation and copy number alteration discovery in cancer by exome sequencing. *Genome Res.*  
710 2012;22(3):568-76. Epub 2012/02/04. doi: 10.1101/gr.129684.111. PubMed PMID: 22300766;  
711 PubMed Central PMCID: PMC3290792.

712

713

714

715

716

717

718

719

720

721

722

723

724

725

726

727

728

729

730

731

732

733

734

735 **Figures**

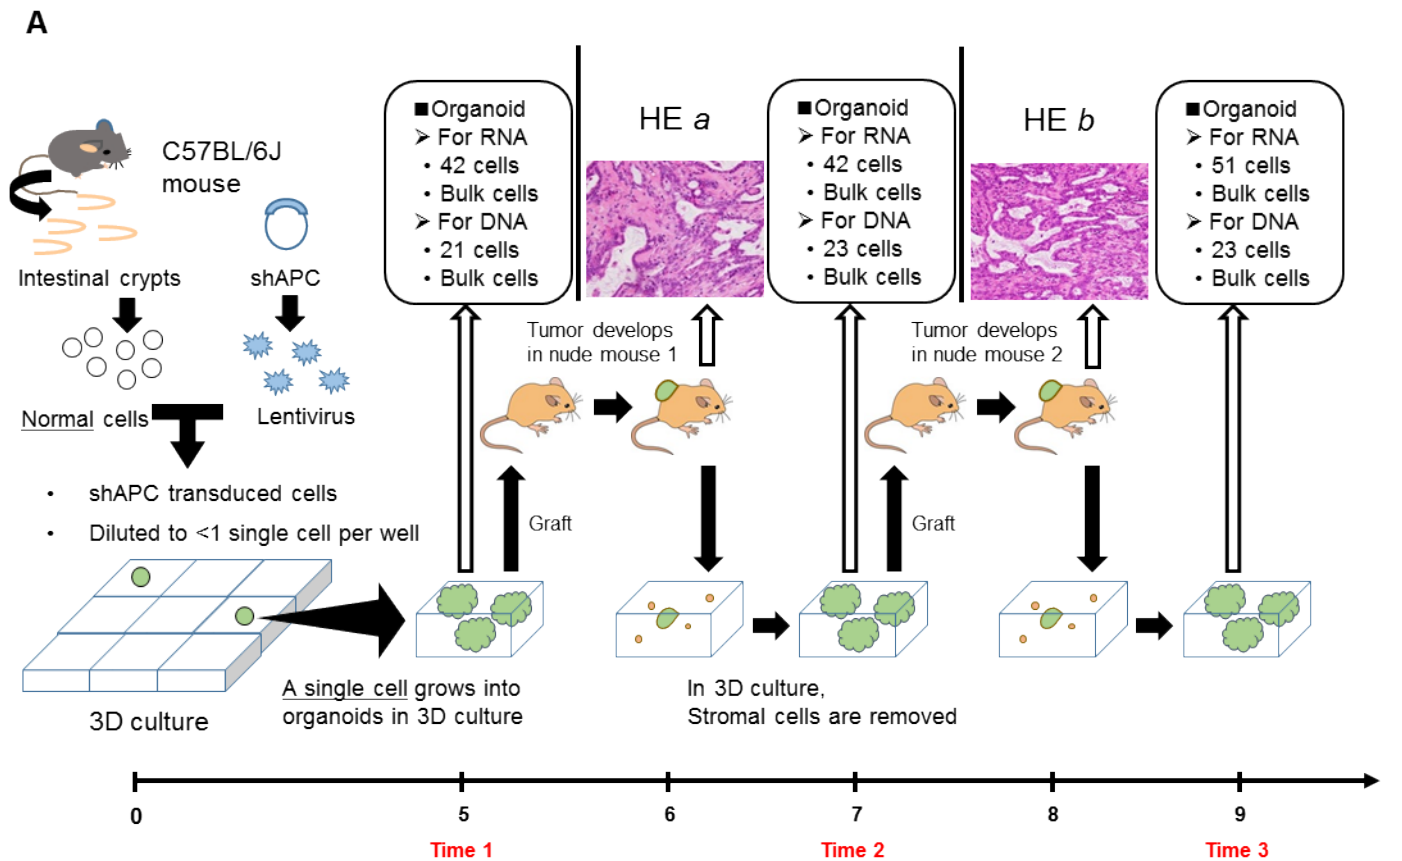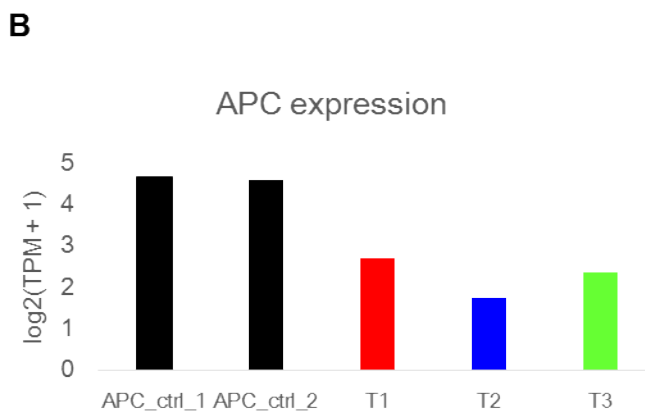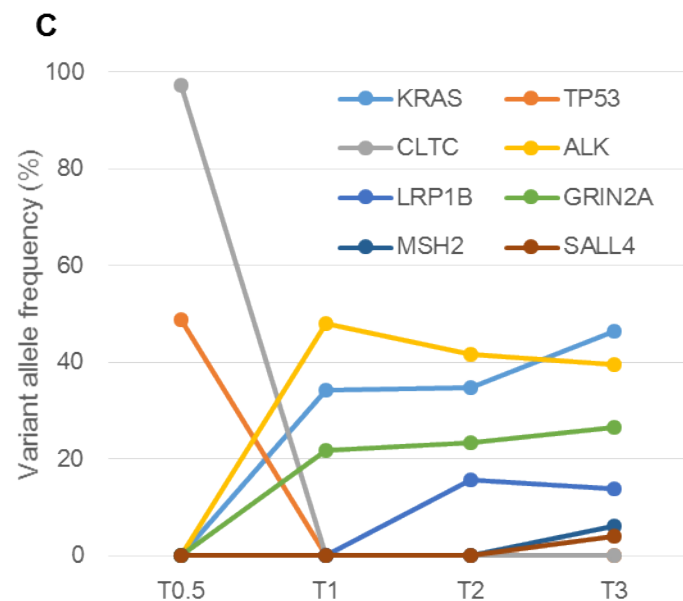

736

737 **Fig. 1.** The mouse model. (A) The experimental procedure and HE staining of subcutaneously transplanted

738 tumors. *One single cell* was 3D-cultured in a compartment in a 96-well plate, and single cell -derived

739 organoids were taken to separate single cells. RNA and DNA were separately extracted from the different

740 single cells of multiple organoids and then sequenced. The numbers of cells for RNA and DNA sequencing  
741 in boxes are those obtained after quality control of data. (B) The *APC* gene expression from bulk-cell RNA  
742 sequencing. “APC\_ctrl” indicates control samples that were cultured in our 3D culture system and derived  
743 from normal cells without *APC* knockdown. (C) Variant allele frequencies of mutations found in the  
744 significantly mutated genes of colorectal cancer by bulk-cell DNA sequencing. See S1 Appendix: **Figure**  
745 **S1** for the annotations of the mutations.  
746

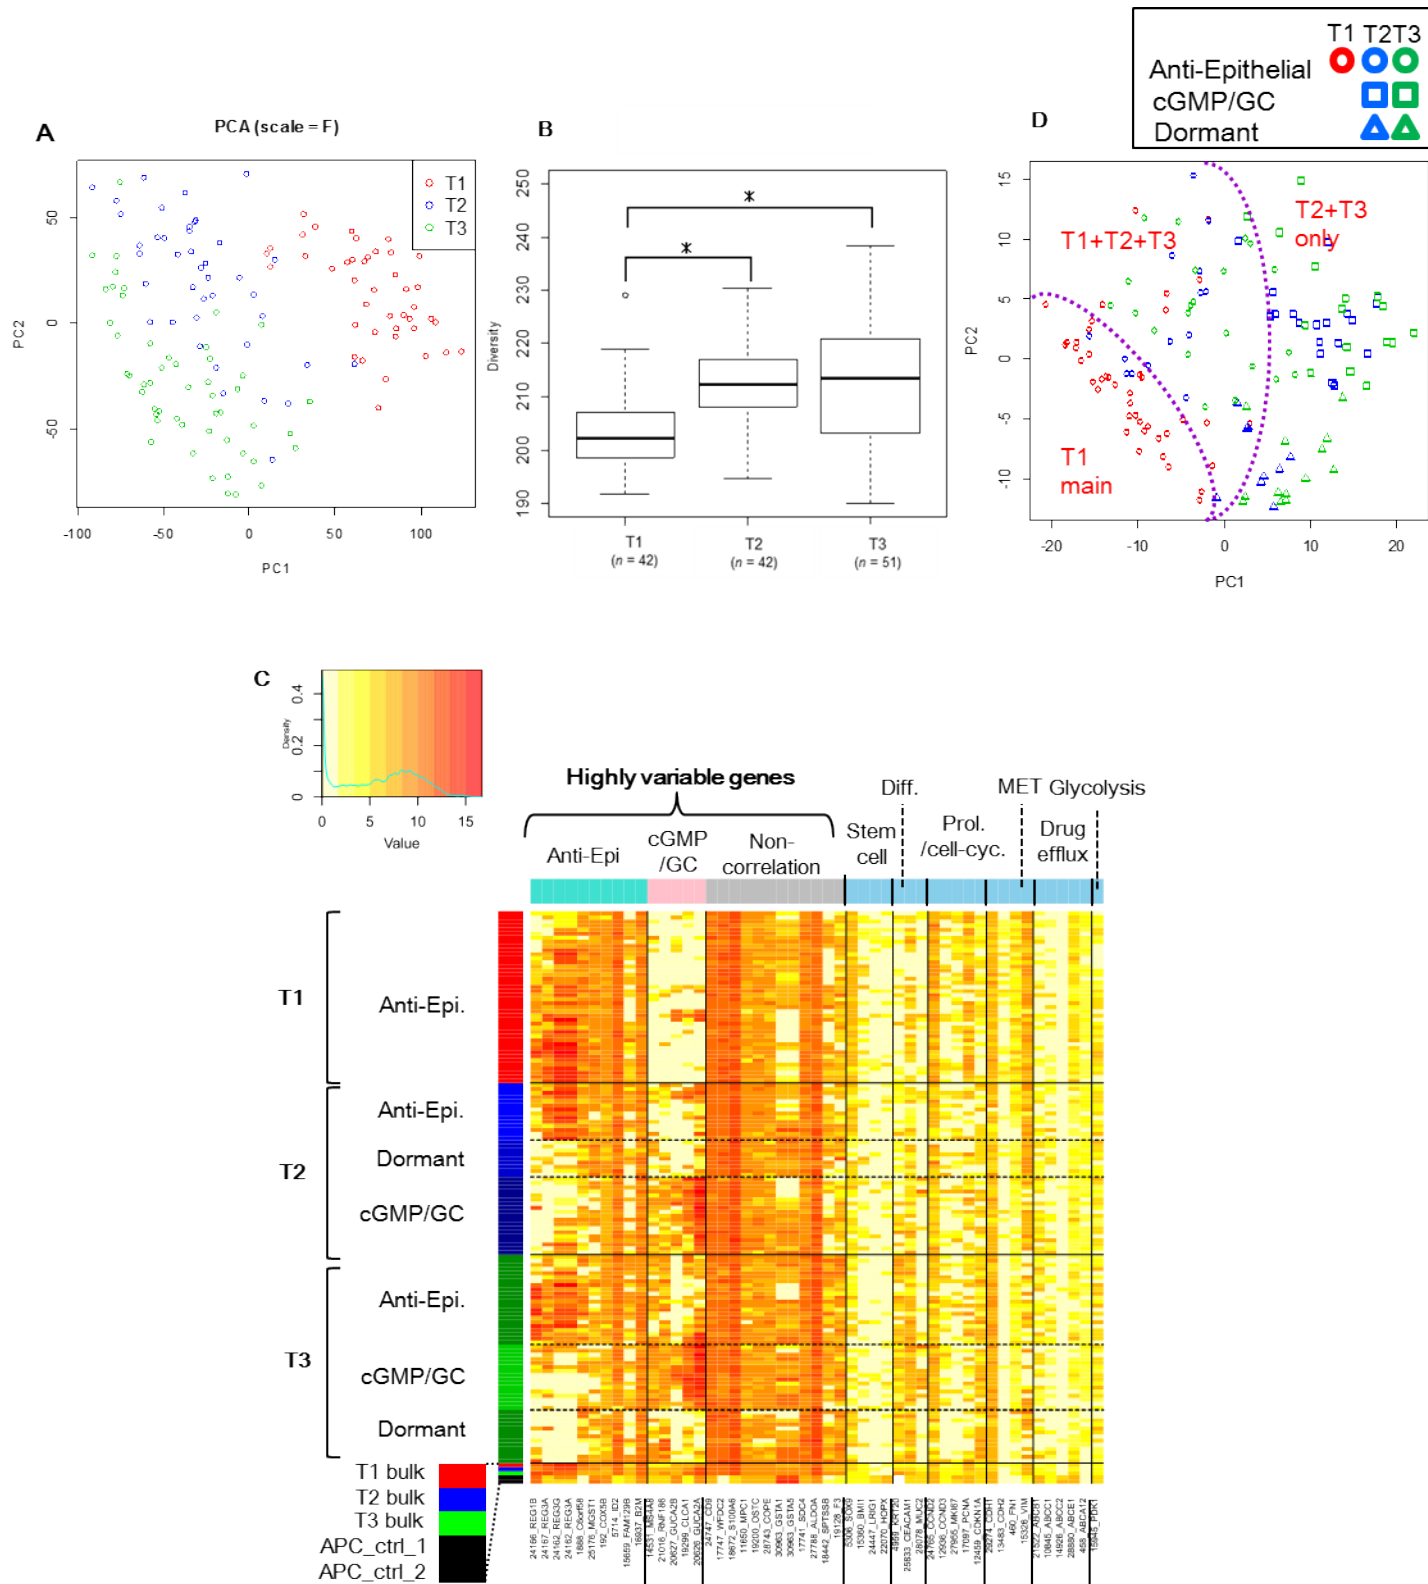

747  
748 **Fig. 2.** Transcriptome analysis. (A) PCA plot of single cells based on expression levels (genes with TPM  $\geq$   
749 10 in at least one cell). T1, at the time of 3D culturing; T2 and T3, after the first and second transplantations,  
750 respectively. (B) Euclidean distance from the centroid in the PCA space (using full dimensions). \* $P < 0.01$

751 (two-sided Wilcoxon rank sum test). (C) Heatmap of gene expression levels (in TPM). The rows represent  
752 single cells or bulk-cell samples (in the bottom), and the columns represent highly variable genes and several  
753 types of marker genes. The cell and gene groups were determined as shown in S1 Appendix: **Figure S4**.  
754 The red, blue, and green codes in the rows correspond to T1, T2, and T3. “Diff.” and “Prol./cell-cyc.”  
755 represents differentiation and proliferation/cell cycle. “APC\_ctrl” indicates control samples that were  
756 cultured in our 3D culture system and derived from normal cells without *APC* knockdown. (D) PCA plot of  
757 cells grouped based on expression levels of highly variable genes.  
758



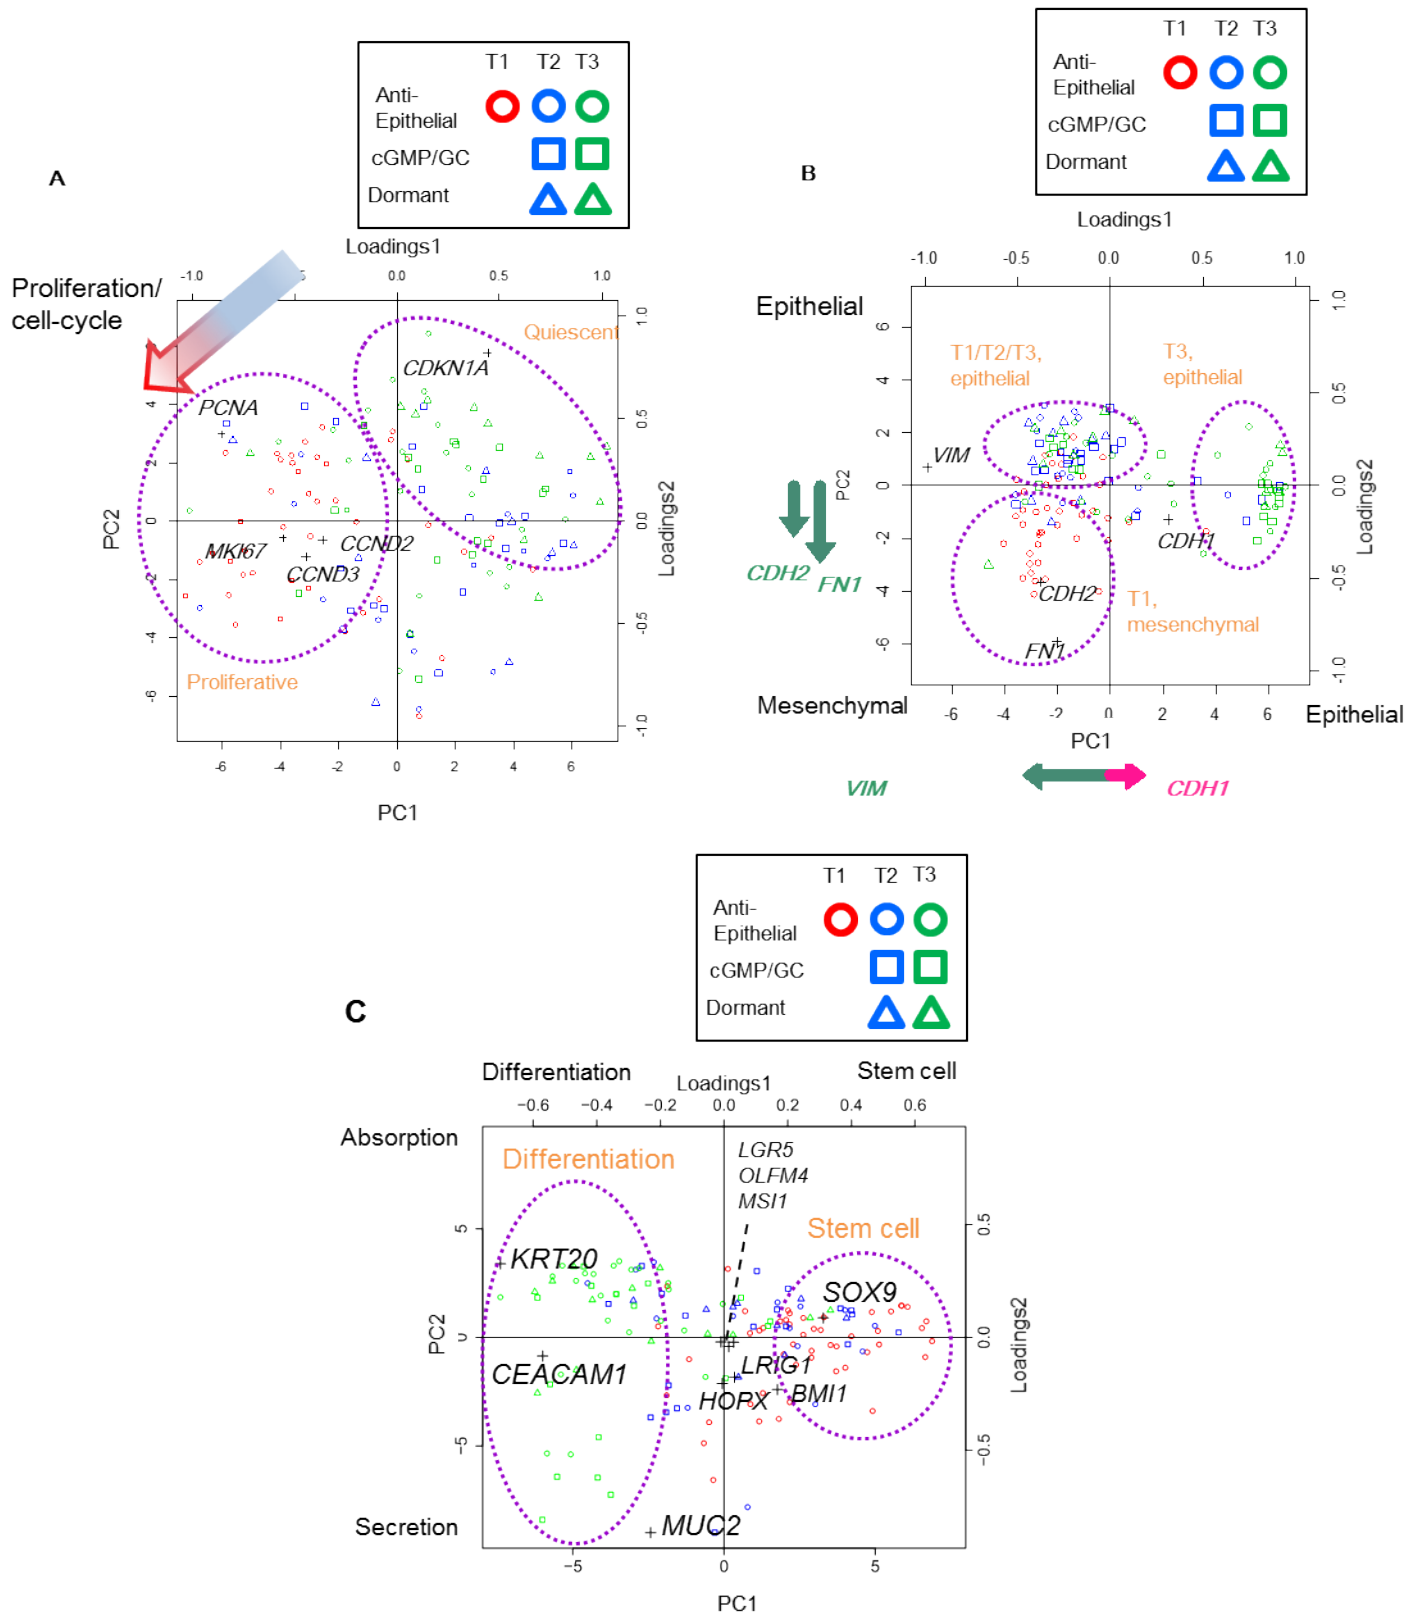

759  
 760 **Fig. 3.** PCA and overlaid loading plots based on expression levels of markers (A) about the proliferation/cell  
 761 cycle. The arrow indicates the direction from negative to positive markers in the loading plot; cells  
 762 positioned in that direction in the PCA plot had higher expression levels of positive marker genes. (B) About

763 the epithelial and mesenchymal. The arrows along the  $x$  and  $y$  axes represent projected loadings in the  
764 loading analysis, where cells positioned in that direction in the PCA plot had higher marker gene expression  
765 levels. (C) About stem cell and differentiation.  
766

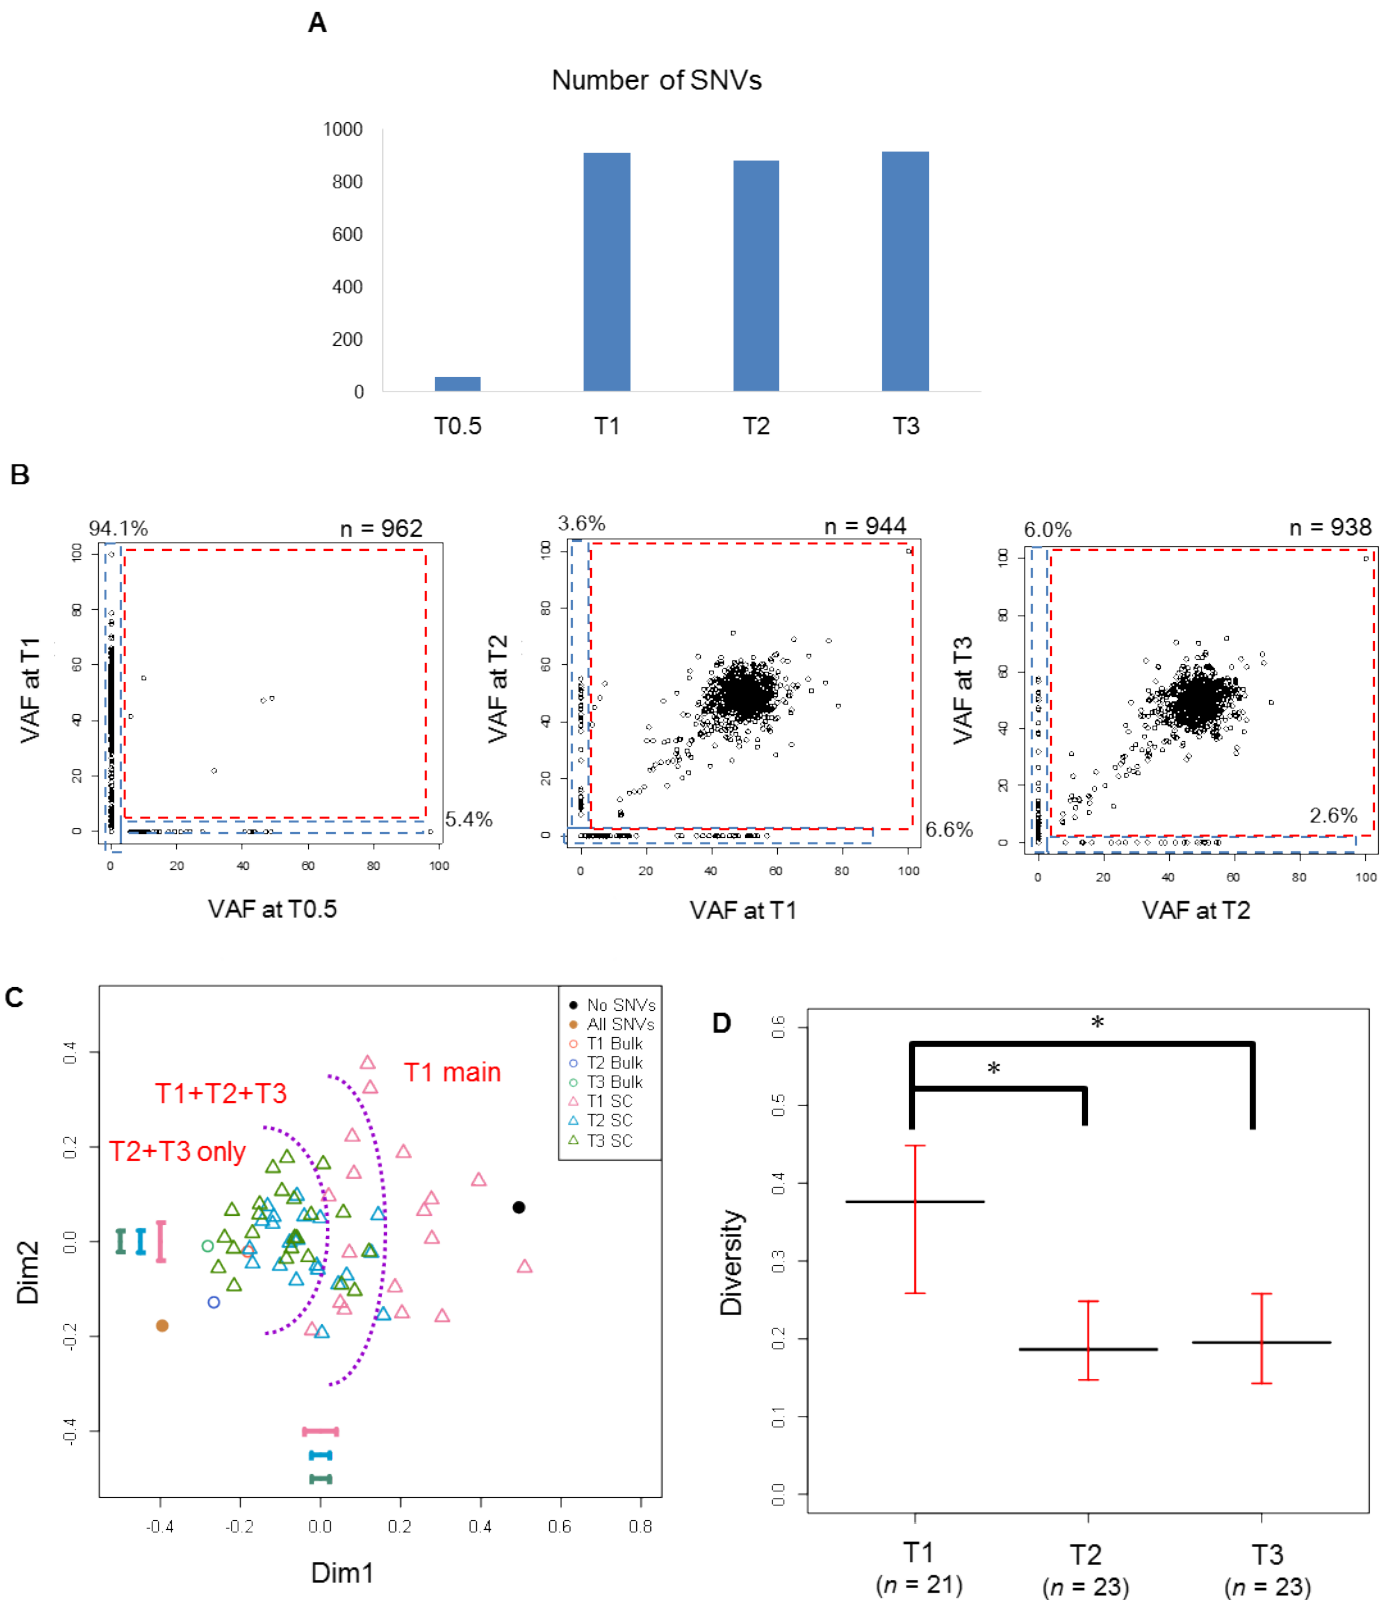

767  
768 **Fig. 4.** Exome analysis. (A) Number of SNVs called in bulk-cell sequencing. (B) Comparison of VAFs of  
769 SNVs called in bulk-cell sequencing at successive time points. One point indicates one SNV. Numbers  
770 represent the number of points. (C) MDS plot based on single-cell exome sequencing. “No SNV” and “All

771 SNV” represent sequences with no SNVs and with SNVs at all sites, respectively, which were artificially  
772 generated as a reference. Error bars represent the standard deviation for each dimension calculated with a  
773 bootstrapping approach that took into account ADO rates. (D) Median Euclidean distance from the centroid  
774 over cells in the MDS space. The black and red bars represent the observed value and 95% confidence  
775 interval calculated with the bootstrapping approach.  $*P < 0.05$  (bootstrapping test).  
776

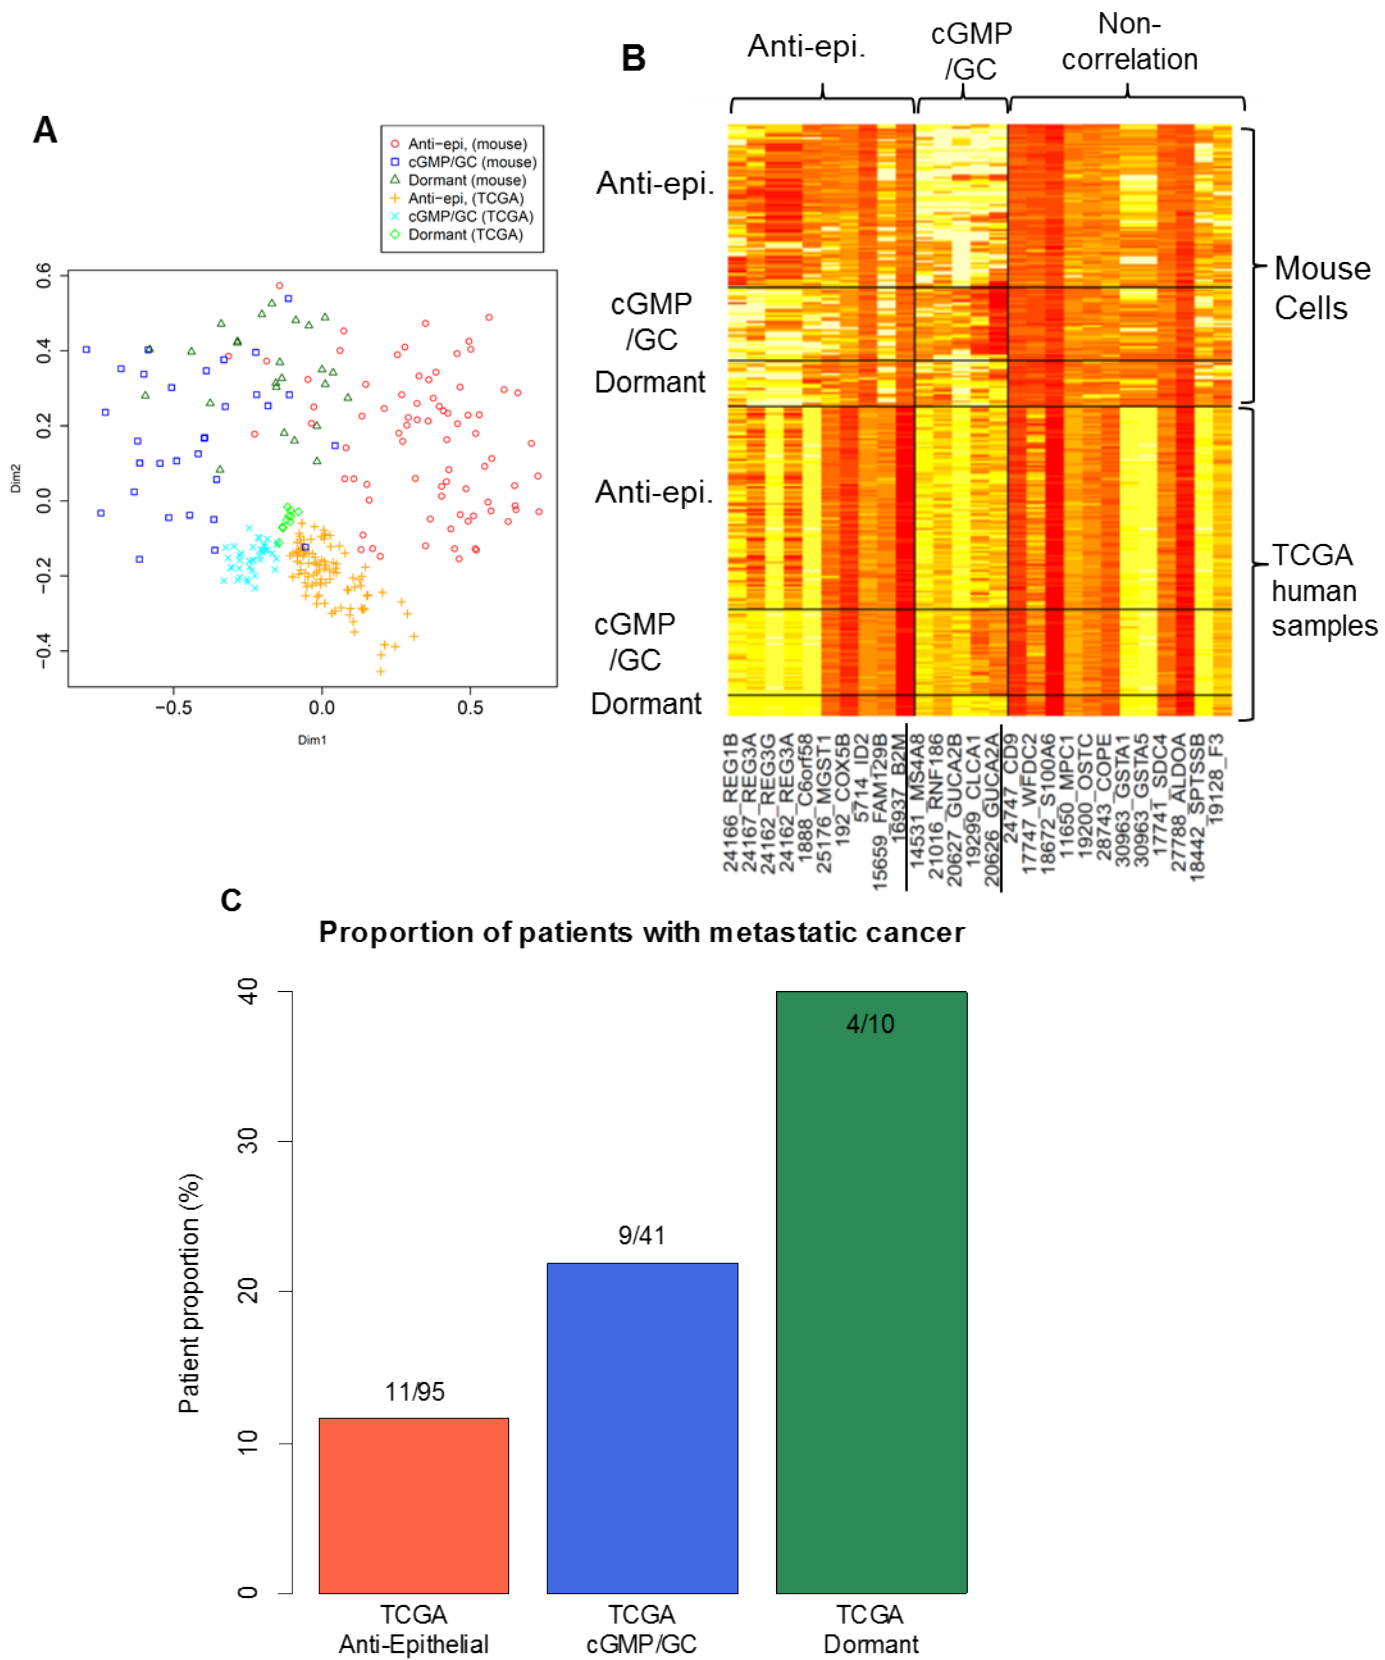

777

778 **Fig. 5.** Analysis of TCGA human samples with gene expression patterns similar to mouse cell groups. (A)

779 MDS plot of mouse single-cell samples and such TCGA samples on the basis of a similarity of gene  
780 expression patterns. (B) Heatmap of the samples. Genes are highly variable genes shown in **Fig. 2C**. (C)  
781 The fraction of patients with metastatic tumor in TCGA samples with expression patterns similar to mouse  
782 cell groups

783

784

785  
786  
787  
788  
789  
790  
791  
792  
793  
794  
795  
796  
797  
798  
799  
800  
801  
802  
803  
804  
805  
806  
807  
808  
809  
810  
811

## Supplementary Results

### Estimation of false positive rate

We first estimated the number of SNV sites that differed between two individual mice of the pure C57BL/6J strain. For normal intestinal tract samples obtained from the two mice, we called SNVs in bulk-cell sequencing data using each of the two samples as the foreground data and the other as the background: the numbers were 1.0 and  $4.5 \times 10^{-7}$  per chromosomal position for the two sample pairs, respectively. When we called SNVs in half-split sequencing data used as the fore- and background data for the same sample, the number of SNVs per position was 0 and  $0.4 \times 10^{-7}$  for the two samples, respectively. Taken together, the false positive rate in bulk-cell sequencing was estimated as  $1.0-4.9 [(1.0 + 0.0) - (4.5 + 0.4)] \times 10^{-7}$ . Because we called SNVs in single cells only at SNV sites called in bulk-cell sequencing data, the false-positive rate in single cells was not more than that in bulk-cell sequencing. Since 10–23% of chromosomal positions were called by our loose criteria for sequencing data from four single cells obtained from normal intestinal tract tissue, the false-positive rate per position in single-cell sequencing was estimated as  $0.1-1.1 \times 10^{-7}$ .

### Association with human cancers

We investigated the features of human colorectal cancer that correspond to those of our mouse cancer model using TCGA human colorectal cancer data and our mouse bulk sequencing data (39). We first examined individual molecular features. SNV density in the mouse model was closer to the hypermutation type of human colorectal cancer (S1 Appendix: **Figure S7**). The expression of *MLH1*, the dysregulation of which causes hypermutation, was repressed with the levels decreasing over time (from T1 to T3) (S1 Appendix: **Figure S7**). The average copy number across the mouse genome was closer to the hypermutation type, indicating low chromosomal instability (S1 Appendix: **Figure S7**). Taken together, these results suggest that the mouse model was closer to the hypermutation type (albeit not extremely hyper) of human cancer.

We then analyzed clinical features in a machine learning approach (Random Forest) using a

812 clinical feature as the objective variable and omics (SNV/indel/RNA) data as explanatory variables. Of the  
813 three histological types, including colon and rectal mucinous adenocarcinoma, our mouse model was  
814 closest to human colon adenocarcinoma and was closer to the MSI-high than MSI-low and microsatellite-  
815 stable types (S1 Appendix: **Figure S8**). Thus, our mouse model represented the MSI-high hypermutation  
816 (although, not extremely hyper) type of human colon adenocarcinoma.  
817



818 **S1 Appendix: Supplementary Figures**

819 **A**

820

| HumanGene     | Chr | Start       | End         | Mut_type | Ref | Alt | Notion           | Reference           |
|---------------|-----|-------------|-------------|----------|-----|-----|------------------|---------------------|
| <i>KRAS</i>   | 6   | 145,169,253 | 145,169,253 | indel    | -   | A   | intronic         | TCGA SMG            |
| <i>TP53</i>   | 11  | 69,402,151  | 69,402,151  | snv      | A   | T   | nonsynonymousSNV | TCGA SMG and COSMIC |
| <i>CLTC</i>   | 11  | 86,520,656  | 86,520,656  | snv      | A   | T   | nonsynonymousSNV | COSMIC              |
| <i>ALK</i>    | 17  | 72,952,883  | 72,952,883  | snv      | A   | C   | nonsynonymousSNV | COSMIC              |
| <i>LRP1B</i>  | 2   | 40,724,718  | 40,724,718  | snv      | C   | T   | nonsynonymousSNV | COSMIC              |
| <i>GRIN2A</i> | 16  | 9,579,188   | 9,579,188   | snv      | T   | C   | nonsynonymousSNV | COSMIC              |
| <i>MSH2</i>   | 17  | 88,079,144  | 88,079,144  | snv      | C   | T   | nonsynonymousSNV | COSMIC              |
| <i>SALL4</i>  | 2   | 168,580,005 | 168,580,005 | snv      | C   | T   | nonsynonymousSNV | COSMIC              |

821

822

**B**

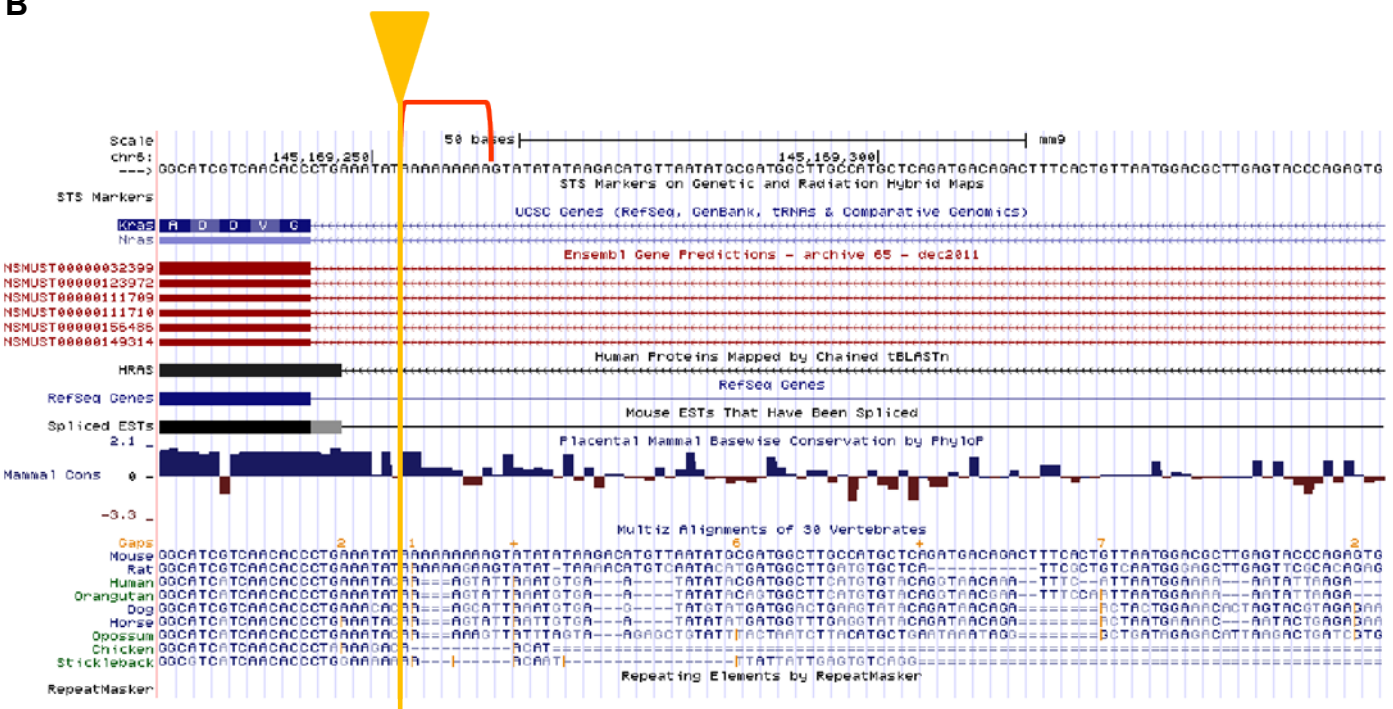

823

824 **Figure S1** Details of mutations found in the significantly mutated genes of TCGA colorectal cancer and in

825 cancer-related genes referred in COSMIC by bulk-cell DNA sequencing.

826 (A) Annotations of genes found in the significantly mutated genes of TCGA colorectal cancer and in

827 COSMIC cancer-related genes by bulk-cell DNA sequencing. (B) The *KRAS* mutation in the mouse

828 genome by the UCSC genome browser. The reversed U symbol in red indicates a mono-repeat of A. The

829 arrow and line in gold indicate the position of mutation.

830

831

**A**

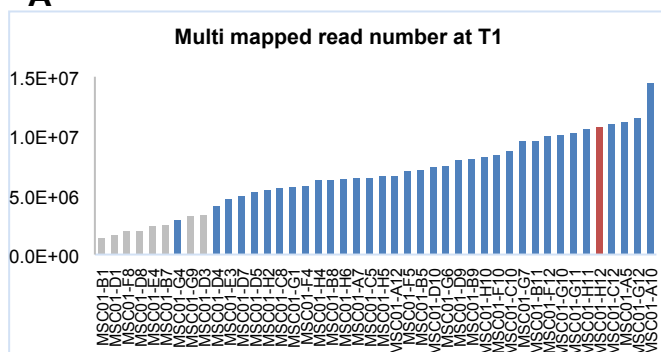

832

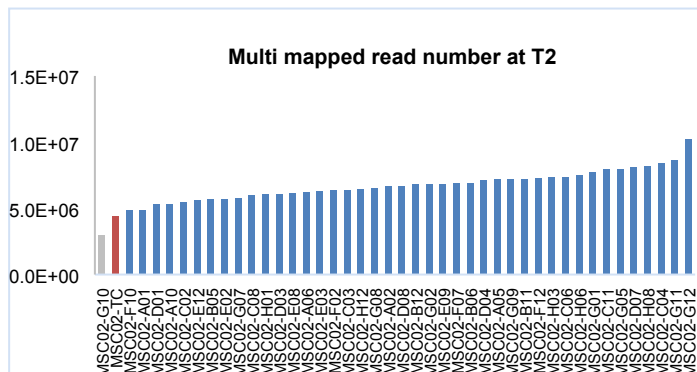

833

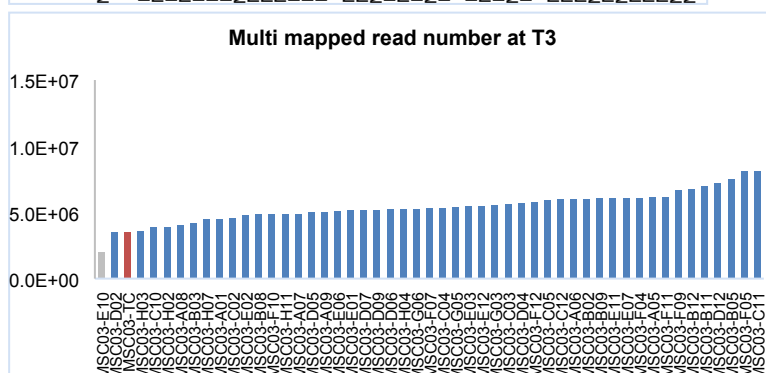

834

835

836

837

838

**B**

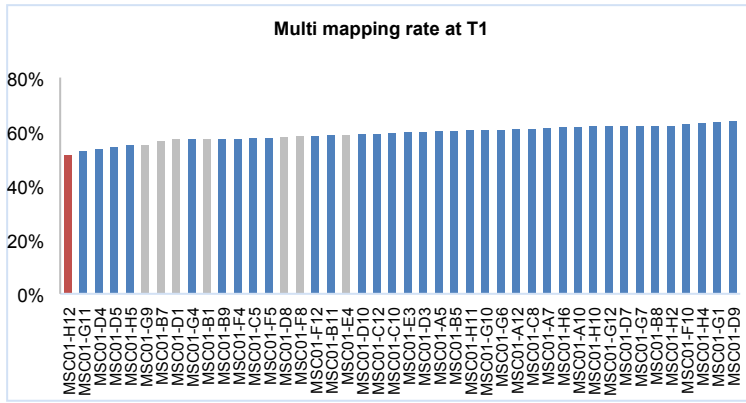

839

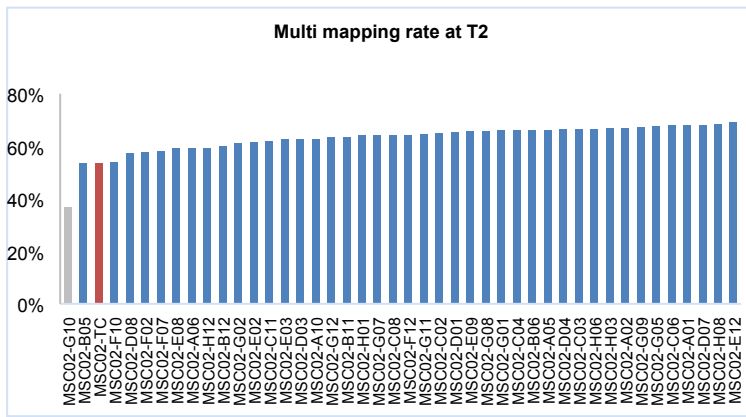

840

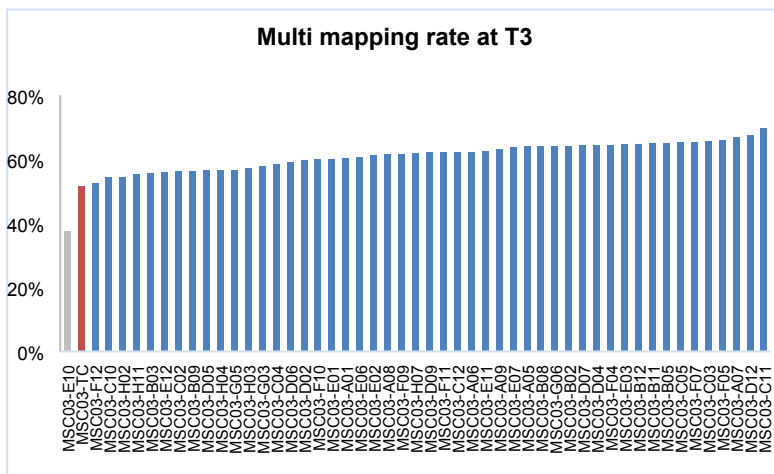

841

842

843

844

845

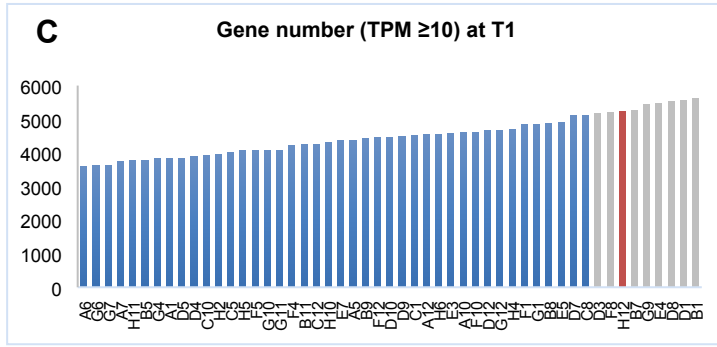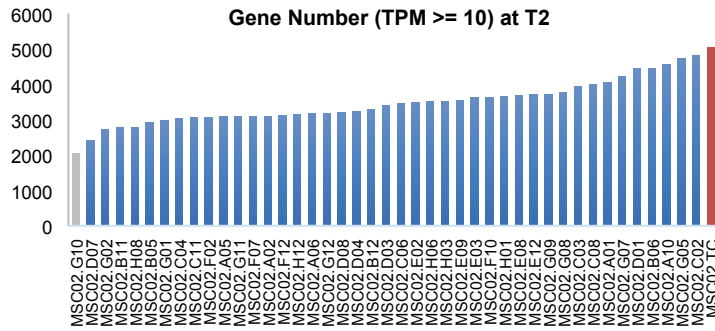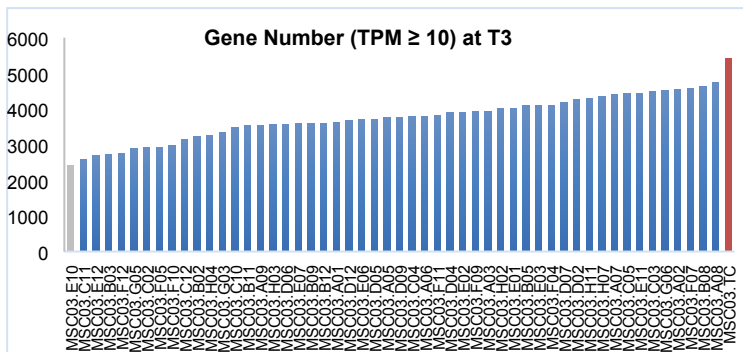

859

860

**D**

T1

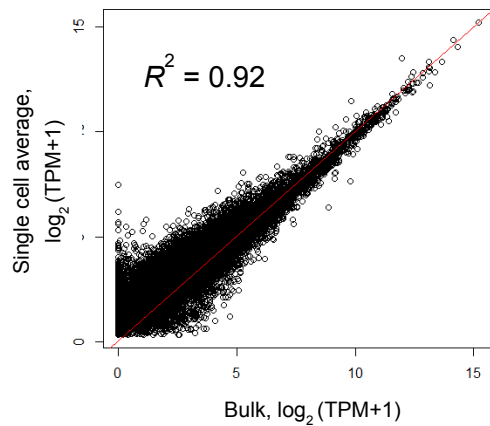

T2

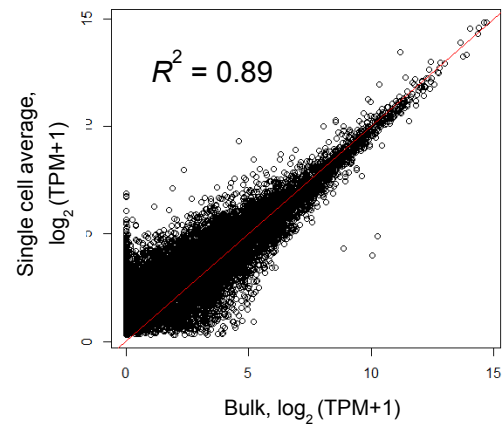

866

867

T3

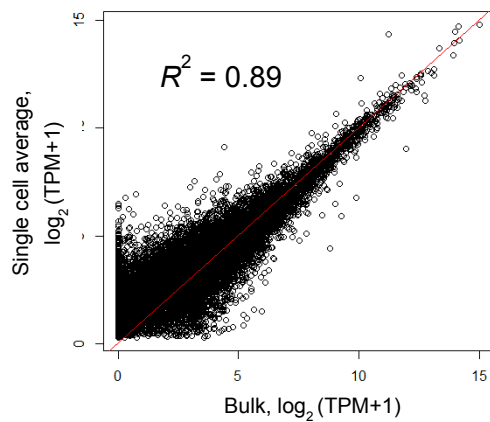

873

874

875 **Figure S2** Quality check of single-cell transcriptome sequencing data. (A) Number of mapped reads, (B)  
876 mapping rate, and (C) number of expressed genes ( $\text{TPM} \geq 10$ ). We removed outliers (gray) based on the  
877 combination of the number of expressed genes ( $\leq 5200$ ) and number of mapped genes ( $\leq 2.2 \times 10^6$ ), and  
878 mapping rate ( $\leq 20\%$ ). Blue and orange bars represent single-cell samples that were ultimately used and bulk  
879 samples, respectively. (D) Scatter plot of gene expression levels from a bulk sample versus expression levels  
880 averaged across the single cells that were ultimately used.

881

882

883

884

885

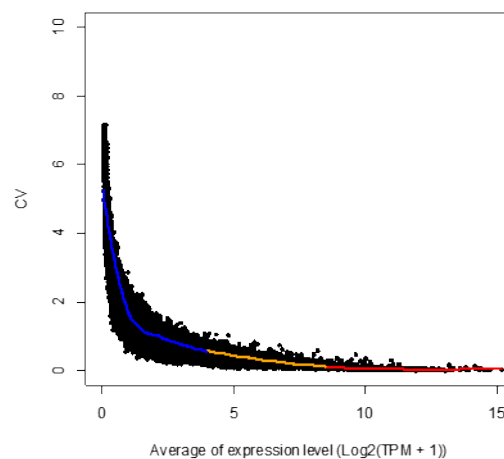

886  
887  
888  
889  
890  
891  
892  
893  
894  
895  
896  
897  
898  
899  
900  
901  
902  
903  
904  
905  
906  
907  
908  
909  
910  
911  
912

**A**

**B**

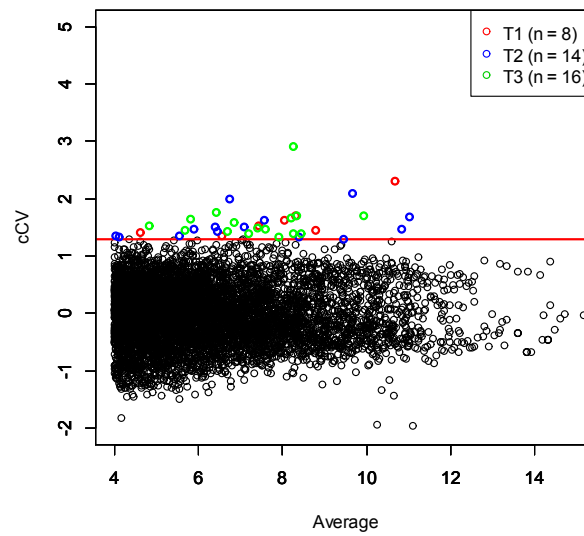

**C**

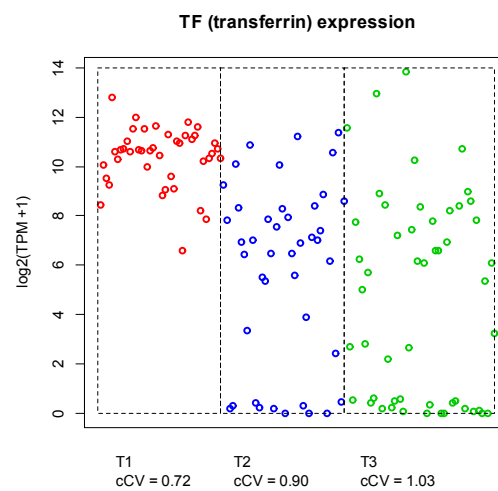

**Figure S3** *cCV* and highly variable genes. (A) *CV* versus gene expression levels averaged across single

913 cells. Regression analysis was performed to obtain the locally weighted scatterplot smoothing (LOWESS)  
914 curve within the range indicated by each color (blue, yellow, and red). (B)  $cCV$  and average expression  
915 levels. Highly variable genes are shown above the red line. (C)  $cCV$  and distribution of gene expression  
916 levels across single cells, illustrated with the transferrin gene. Each circle represents gene expression level  
917 in a single cell.

918

919

920

921

922

923

924

925

926

927

928

929

930

931

932

933

934

935

936

937

938

939

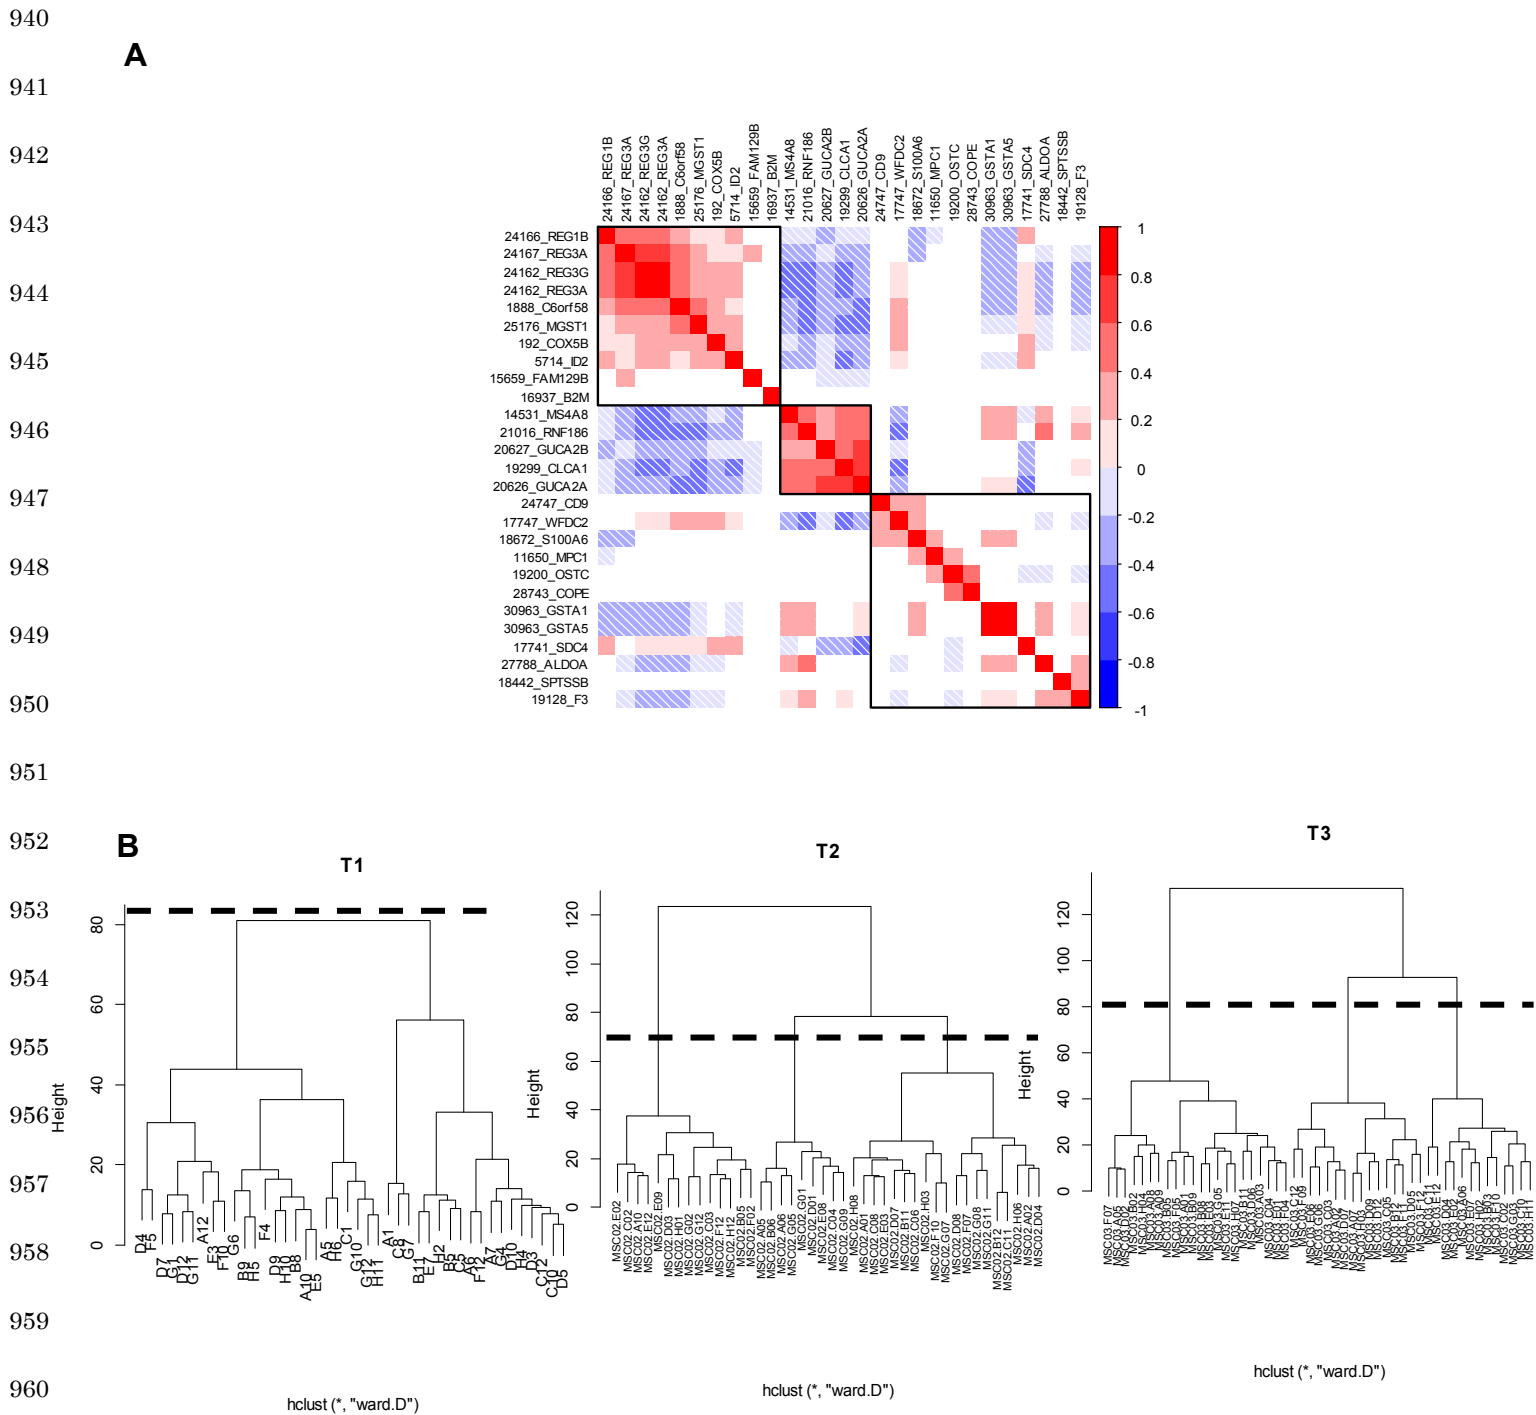

**Figure S4** Determination of gene and cell groups in single-cell RNA sequencing. (A) Correlation plot of highly variable genes. (B) Dendrogram of single cells.



966

967

**A** Proliferation/cell-cycle

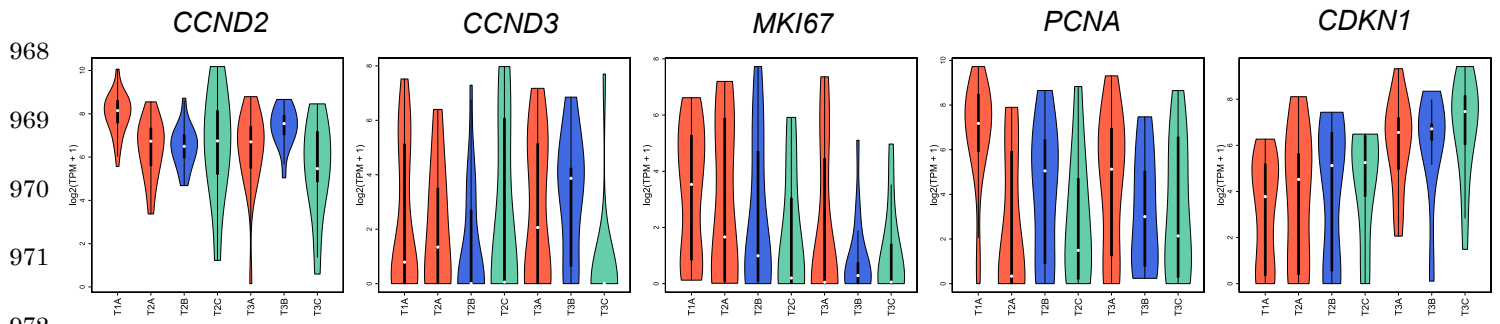

972

**B** Epithelial

Mesenchymal

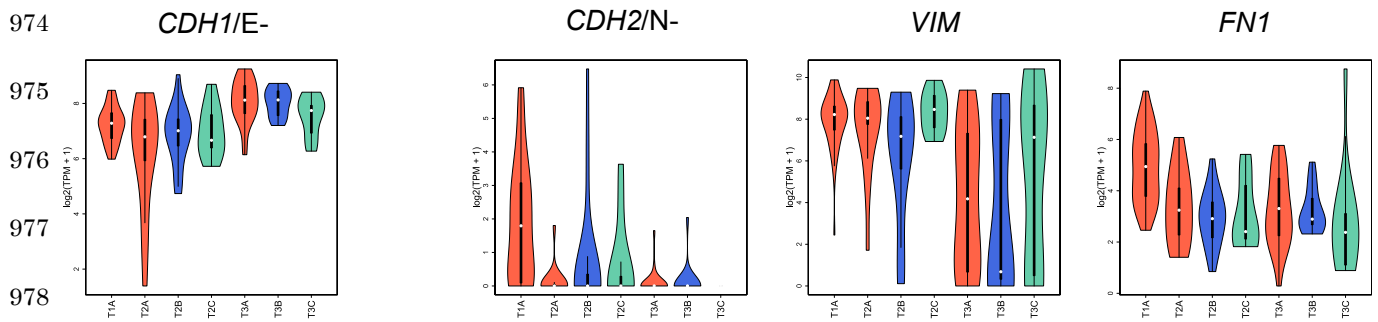

978

**C**

Stem (+0)

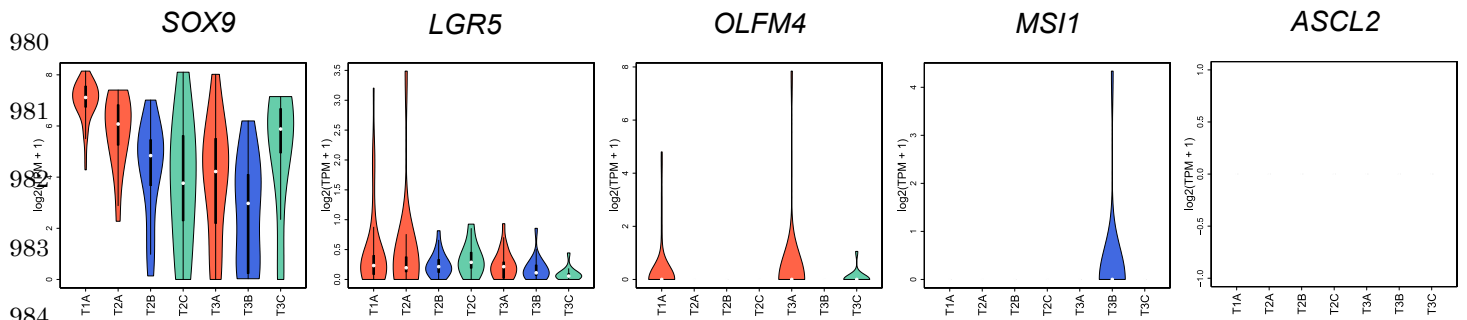

984

Stem (+4)

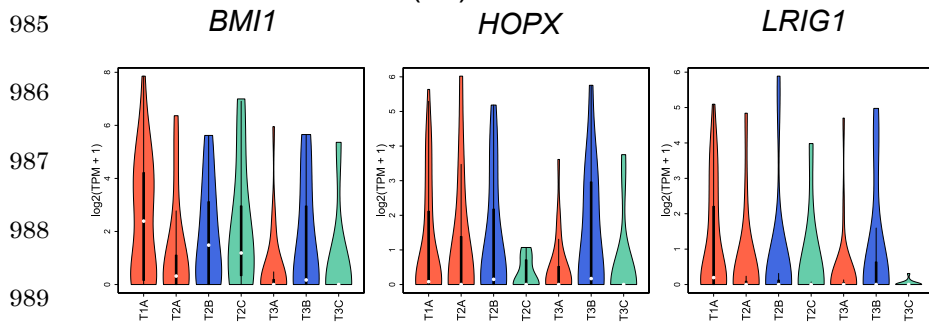

989

990

991

992

993

994

### Differentiation (Absorption)

995

*CEACAM1*

*KRT20*

*AQP8*

*CA1*

*SLC26A3*

996

997

998

999

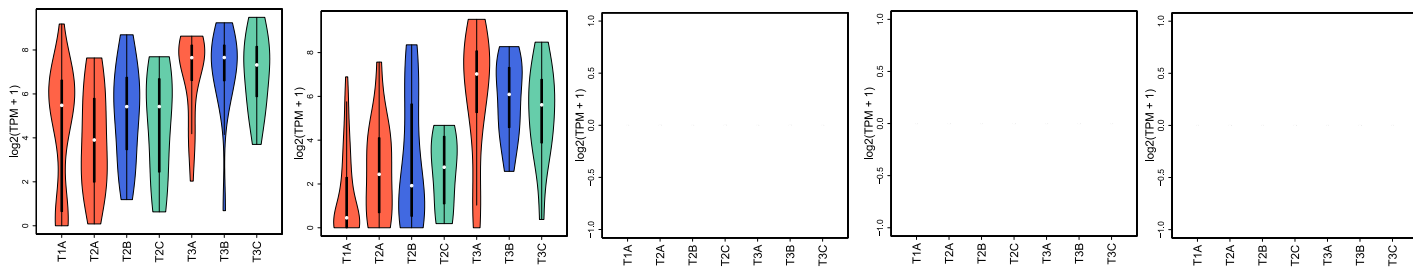

1000

### Differentiation (Secretion)

1001

*MUC2*

*SPINK1*

1002

1003

1004

1005

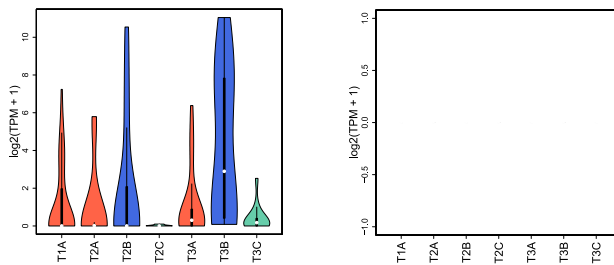

1006

**D**

### Drug efflux

1007

*ABCB1*

*ABCE1*

1008

1009

1010

1011

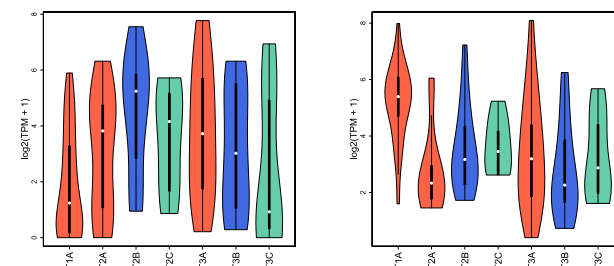

1012

**E**

### Glycolysis

1013

*PDK1*

1014

1015

1016

1017

1018

1019

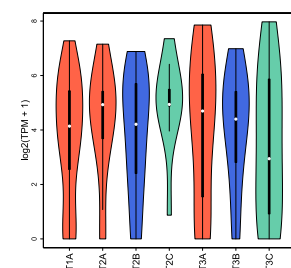

1020 **Figure S5** Violin plots of the expression levels of the marker genes. “A,” “B,” and “C” followed by  
1021 T1/T2/T3 represent Anti-Epithelial, cGMP/GC, and Dormant cell groups, respectively (*n*: 42 for T1A, 14  
1022 for T2A, 19 for T2B, 9 for T2C, 22 for T3A, 16 for T3B, and 13 for T3C). Some genes such as *ASCL2* were  
1023 not expressed in any category. (A) Proliferation/cell-cycle markers, (B) epithelial and mesenchymal markers,  
1024 (C) stem cell and differentiation markers, (D) drug efflux markers, and (E) glycolysis markers.

1025

1026

1027

1028

1029

1030

1031

1032

1033

1034

1035

1036

1037

1038

1039

1040

1041

1042

1043

1044

1045

1046

1047

1048

1049

1050

1051

1052

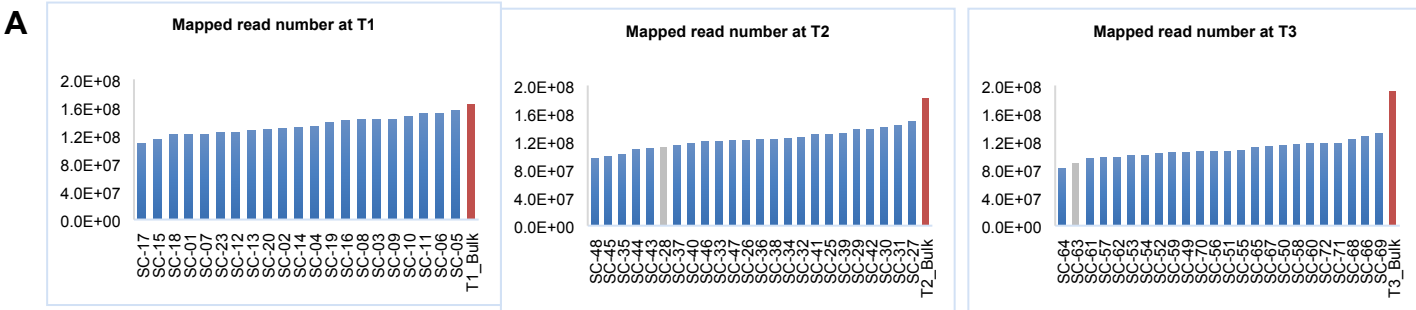

1053

1054

1055

1056

1057

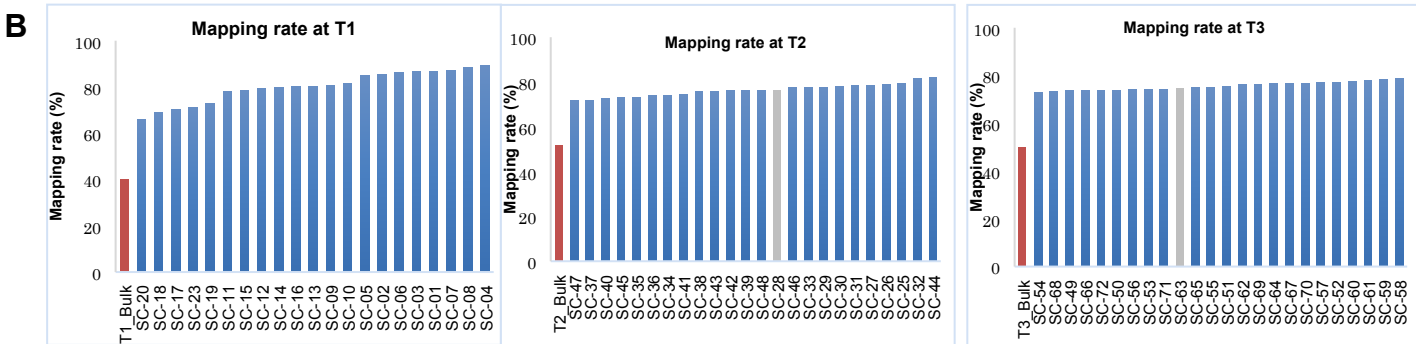

1058

1059

1060

1061

1062

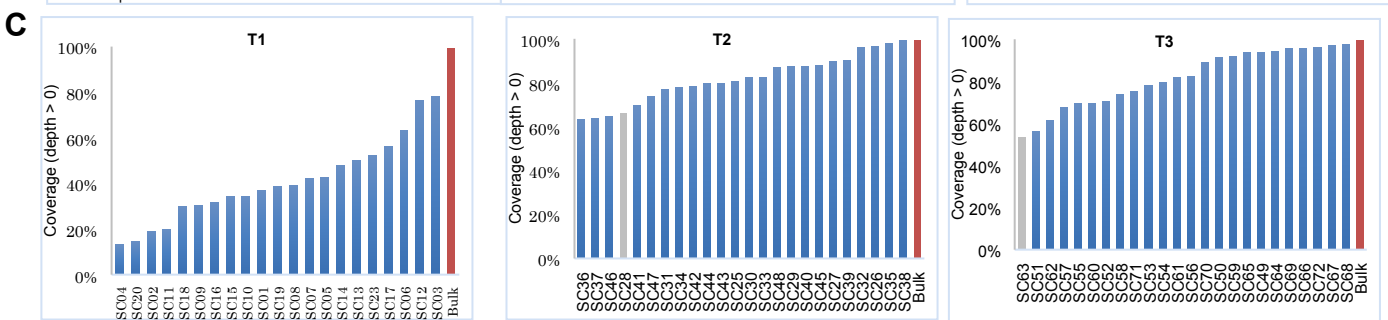

1063

1064

1065

1066

1067

1068

1069

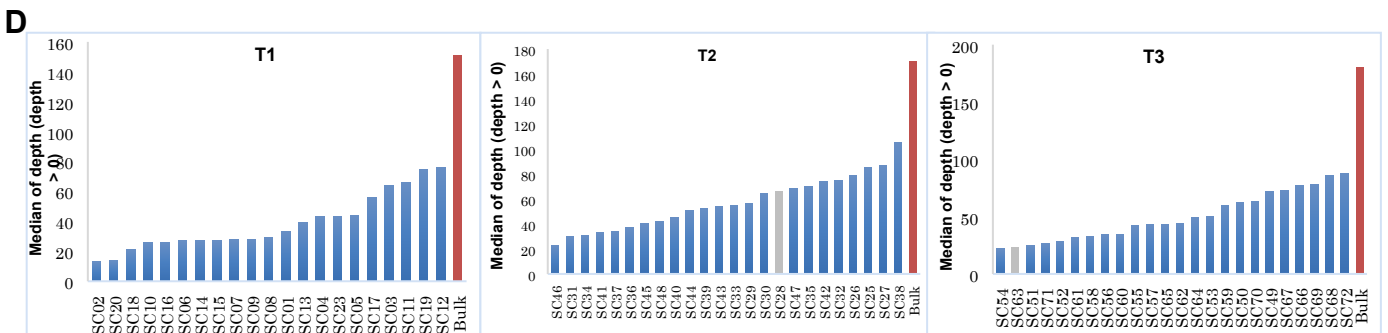

1070

1071

1072

1073

1074

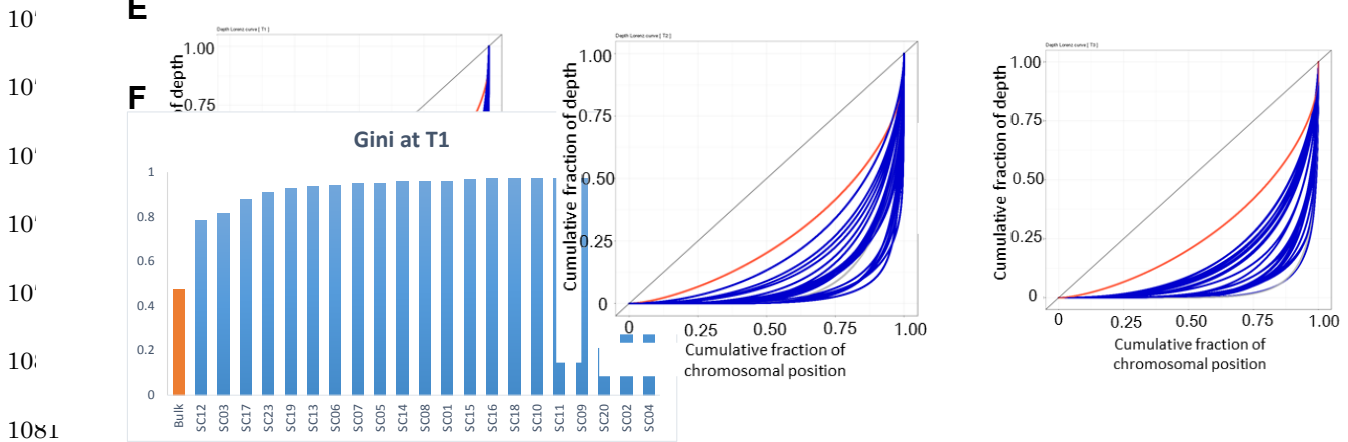

1081

1082

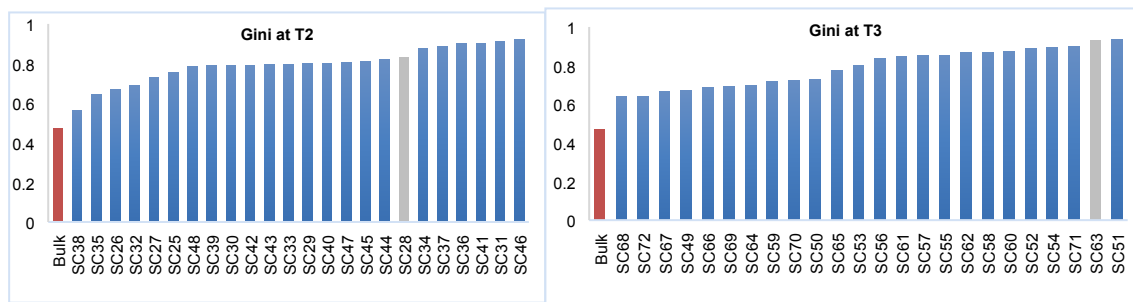

1083

1084

1085

1086

1087

1088

1089

1090

1091

1092

**G**

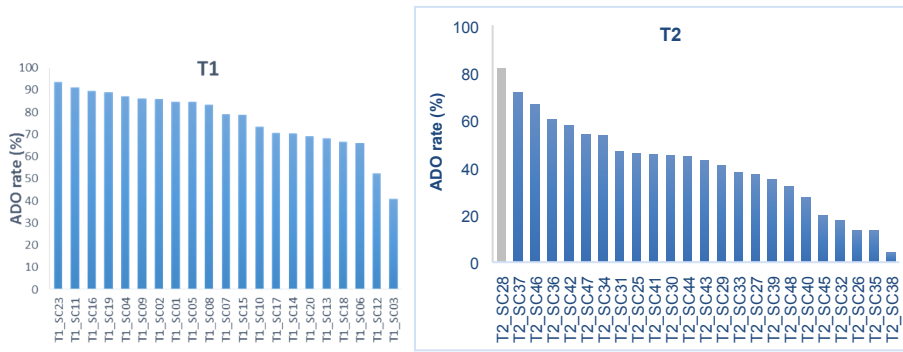

1093

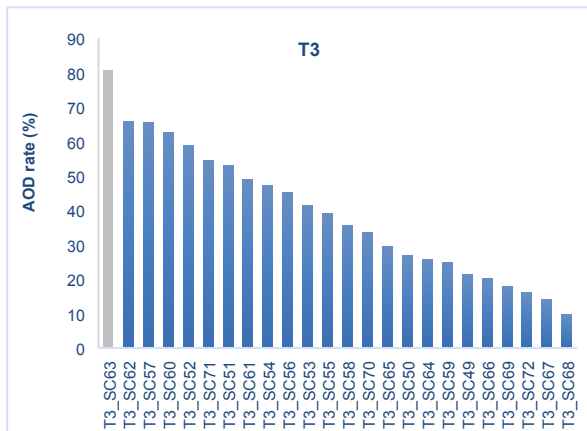

1094

1095

1096

1097

1098

1099

1100

1101

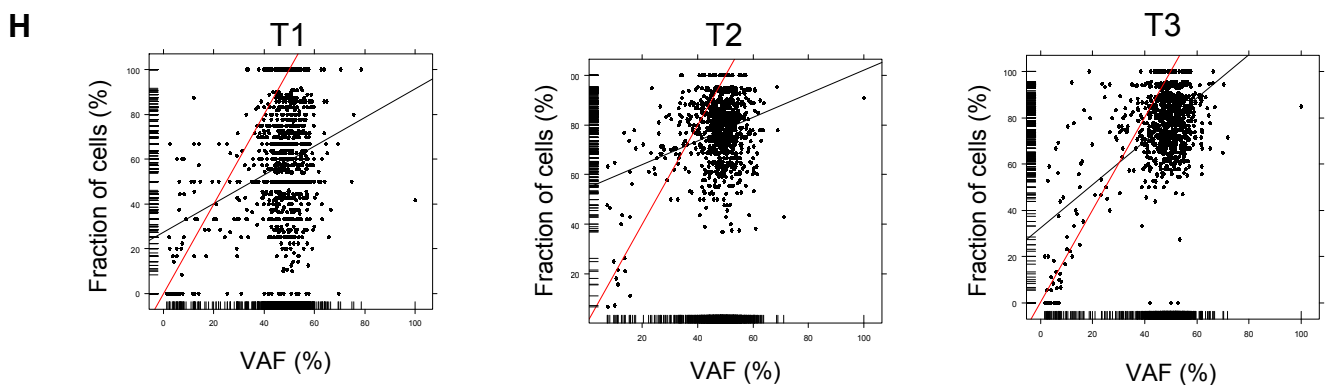

1102 **Figure S6** Quality check of single-cell exome sequencing data. Bars/curves in orange, blue, and gray  
 1103 represent bulk-cell, single-cell, and filtered-out data, respectively. Shown are the (A) number of mapped  
 1104 reads; (B) mapping rate; (C) coverage of genome with depth > 0; (D) median depth, in which regions with  
 1105 depth = 0 were excluded; (E) Lorenz curve of depth (including regions with depth = 0); (F) Gini coefficients  
 1106 of depth (including regions with depth = 0); (G) ADO rate; and (H) Scatter plot of SNVs between VAFs in  
 1107 bulk-cell sequencing and fractions of single cells with SNVs called in single-cell sequencing. Black and red  
 1108 lines represent the linear regression and theoretically expected lines, respectively.

1109  
1110  
1111  
1112  
1113  
1114  
1115  
1116  
1117  
1118  
1119  
1120  
1121  
1122  
1123  
1124  
1125  
1126  
1127  
1128  
1129  
1130  
1131  
1132  
1133  
1134  
1135

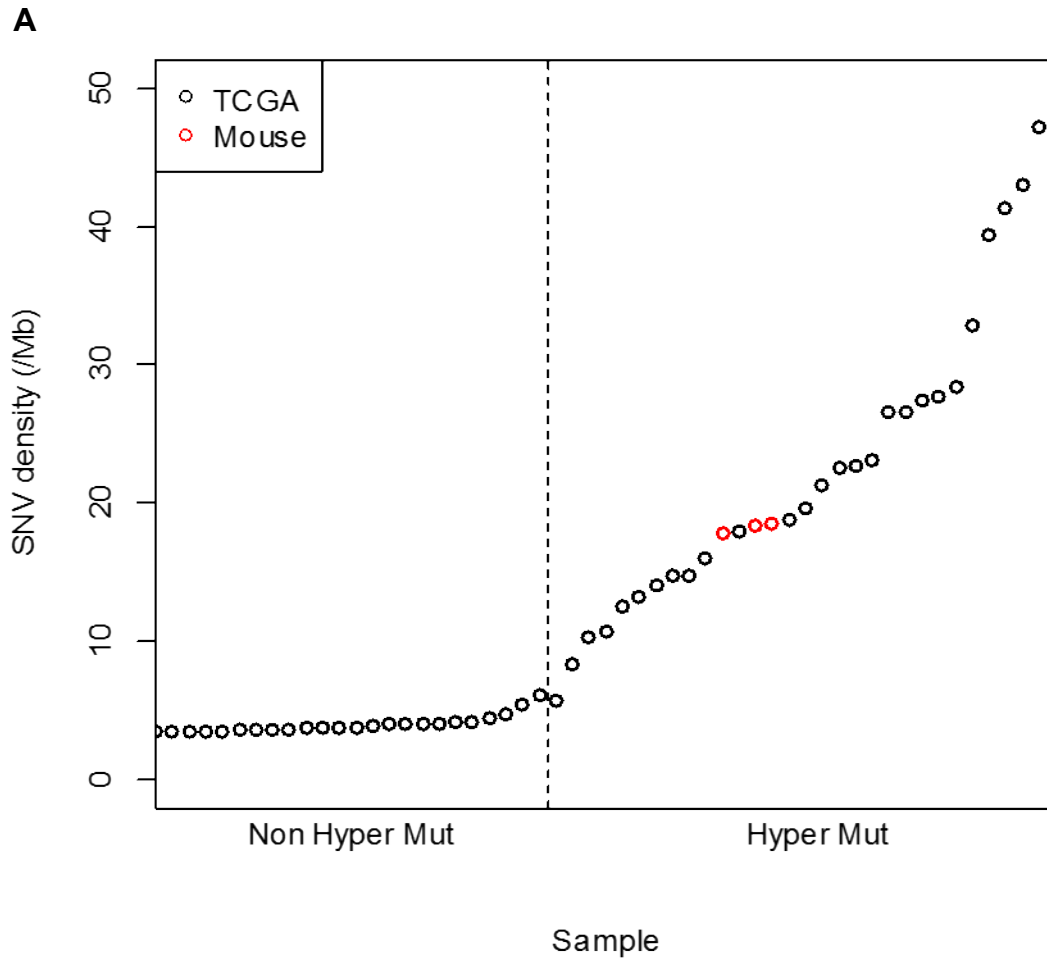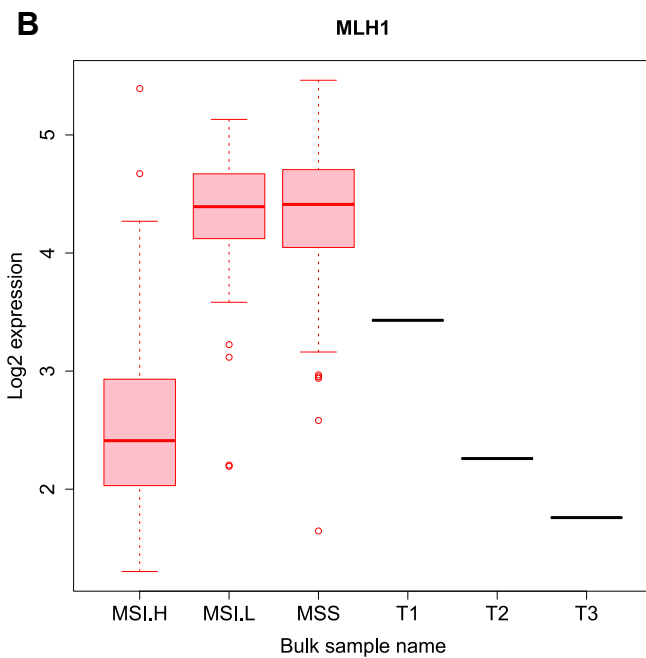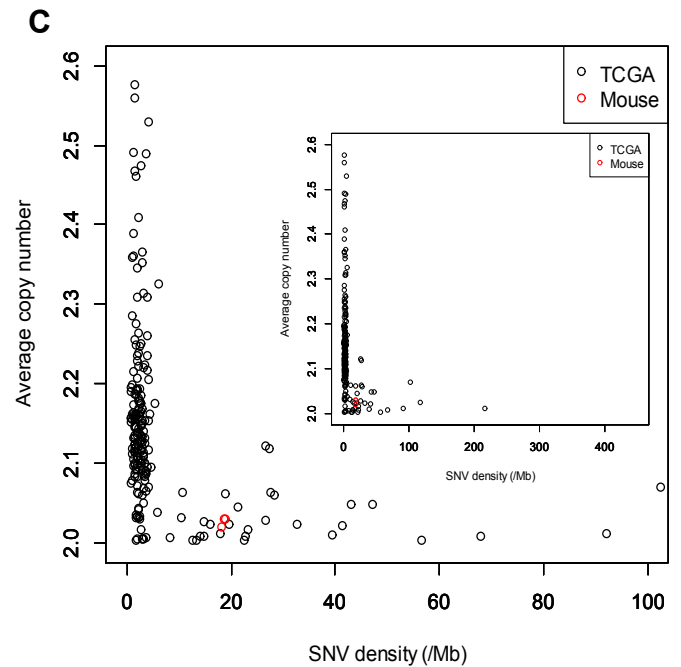

1136 **Figure S7** Human cancer counterpart to our mouse model according to molecular features. (A) SNV density  
1137 in human colorectal cancer and in the mouse model. Black and red circles represent TCGA human colorectal  
1138 cancer samples and mouse samples at T1, T2, and T3, respectively. Broken lines separate hyper and non-  
1139 hyper mutation types. (B) *MLH1* expression in TCGA and mouse samples. MSI.H, microsatellite instability  
1140 high ( $n = 35$ ); MSI.L, microsatellite instability low ( $n = 42$ ); MSS, microsatellite stable ( $n = 166$ ). (C)  
1141 Average copy number across the genome versus SNV density. Insets in panels A and C show zoomed-out  
1142 views.  
1143



1144 A

1145

1146

1147

1148

1149

1150

1151

1152

1153

1154

1155

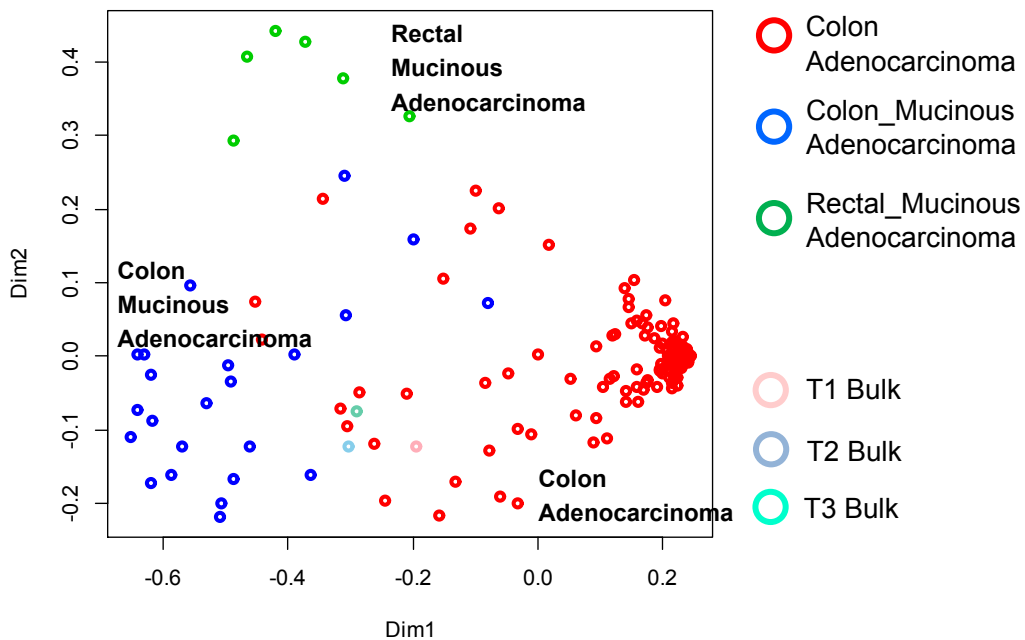

1156 B

1157

1158

1159

1160

1161

1162

1163

1164

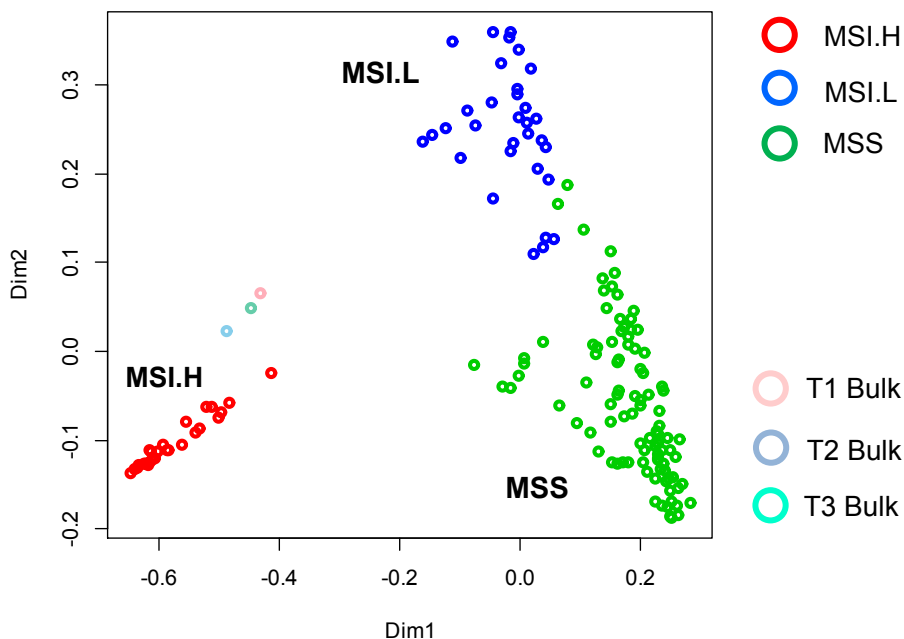

1165 **Figure S8** Human cancer counterpart to our mouse model according to clinical features. Multidimensional

1166 scaling plots generated by Random Forest based on the proximity matrix are shown. (A) For histological

1167 type. (B) For microsatellite instability. MSI.H, microsatellite instability high; MSI.L, microsatellite

1168 instability low; MSS, microsatellite stable.

1169

1170

1171

1172

1173

1174

1175

1176

1177

1178

1179

1180

1181

1182

1183

1184

1185

1186 **Figure S9** Procedure for calculating expression levels and for calling SNVs in single-cell sequencing. (A)

1187 Procedure for calculating expression levels (TPM). (B) Procedure for calling SNVs in single cells (SCs).

1188

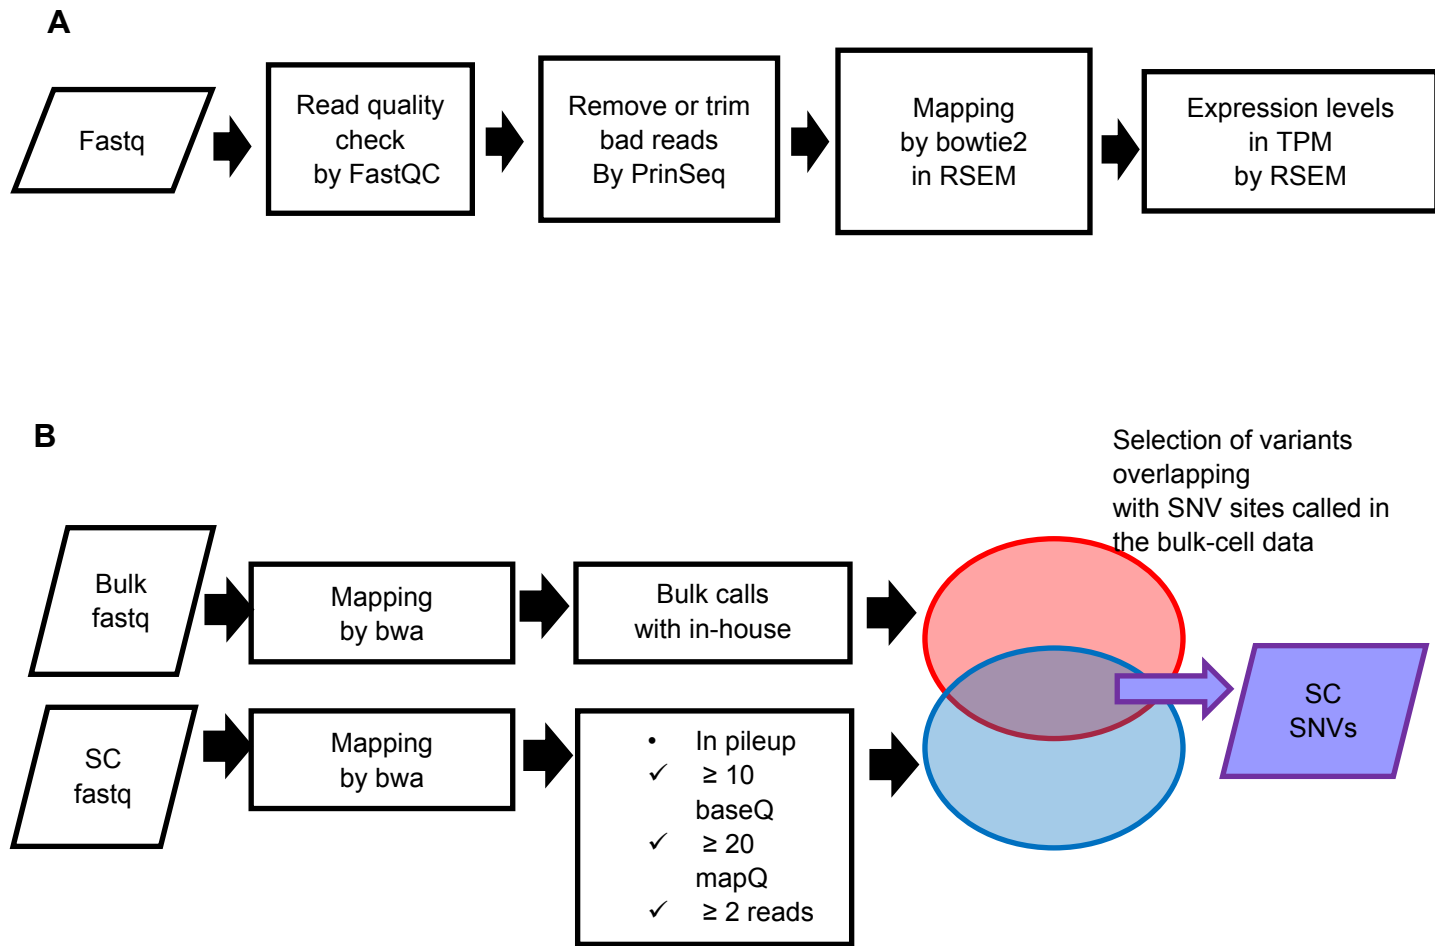

Source: http://biorxiv.org/content/10.1101/616870v1.full.pdf
